# Supplementary material for: Synthesis and Biological Activity of Novel (Z)- and (E)-Verbenone Oxime Esters
Source: PubMed Central journal article supplement (PMC6151715; doi:10.3390/molecules22101678), 2017-10-12
Supplement: molecules-22-01678-s001.pdf [file molecules-22-01678-s001.pdf]

# Synthesis and Biological Activity of Novel (*Z*)- and (*E*)-Verbenone Oxime Esters

Qiong Hu, Wen-Gui Duan \*, Gui-Shan Lin \*, Min Huang and Fu-Hou Lei

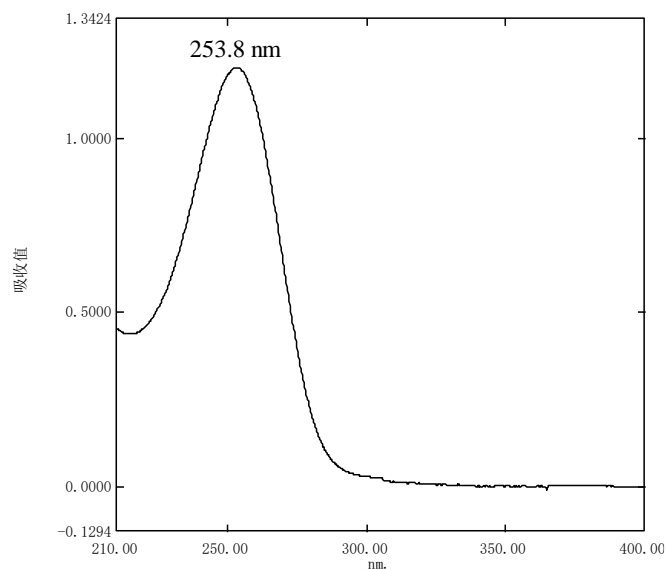

Figure S1. UV-vis spectrum of verbenone 2 in EtOH.

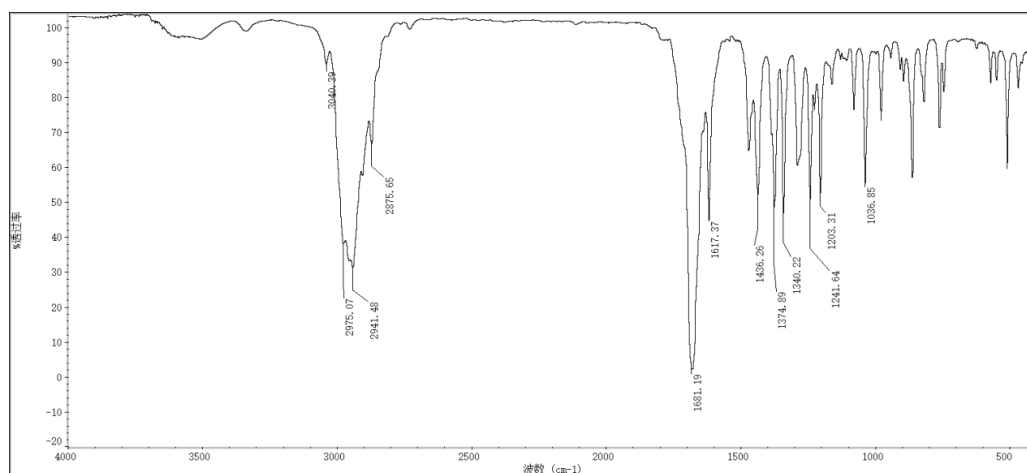

Figure S2. FTIR spectrum of verbenone 2.

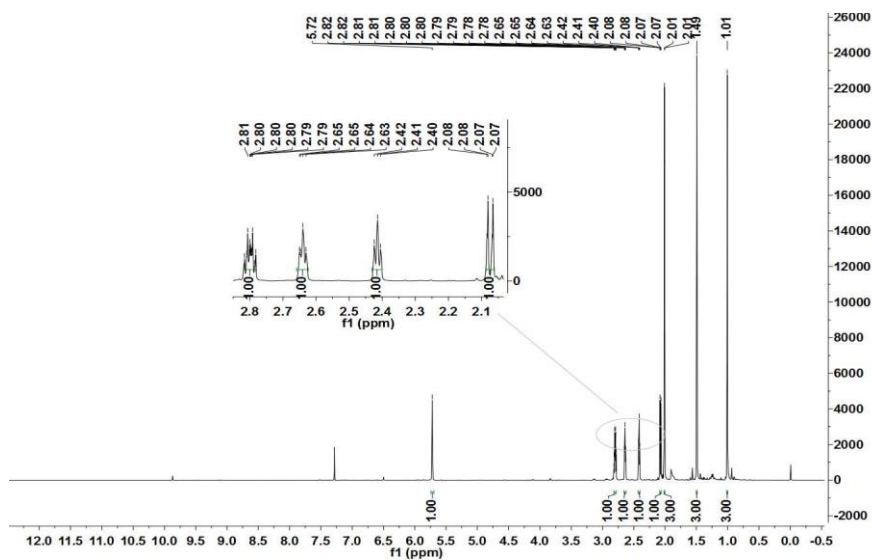

Figure S3. <sup>1</sup>H-NMR spectrum of verbenone 2 in CDCl<sub>3</sub>.

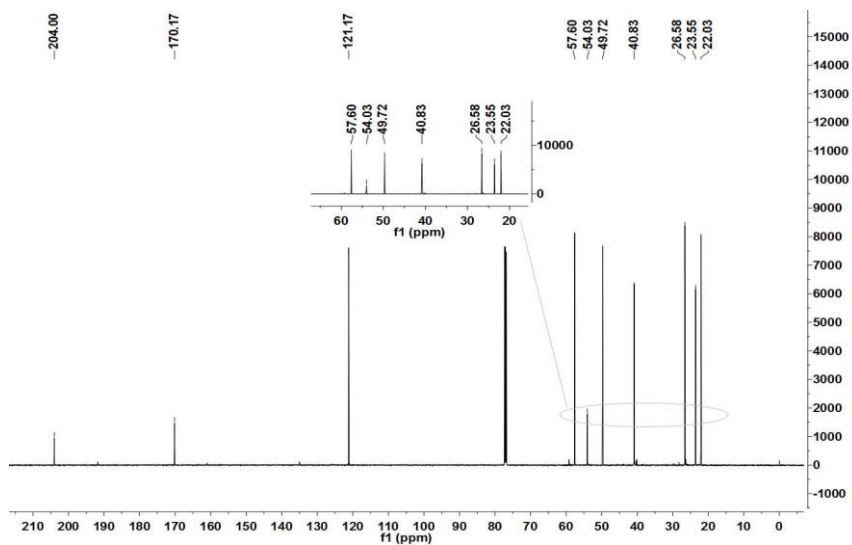

Figure S4. <sup>13</sup>C-NMR spectrum of verbenone 2 in CDCl<sub>3</sub>.

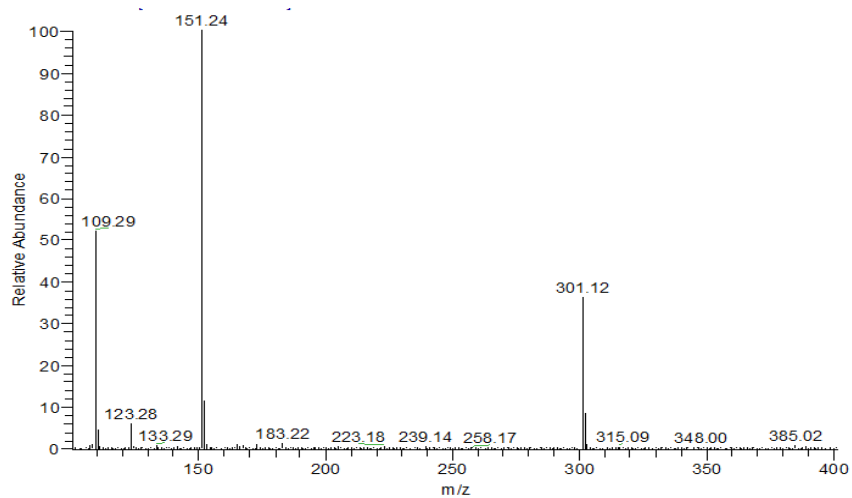

Figure S5. ESI-MS spectrum of verbenone 2.

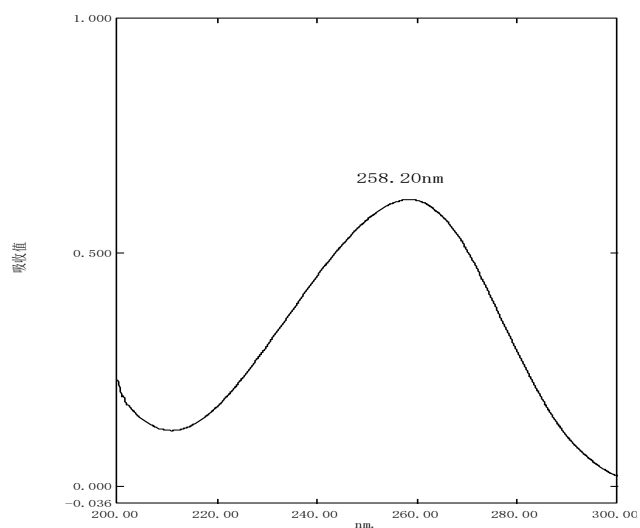

Figure S11. UV-vis spectrum of (Z)-verbenone oxime 3 in EtOH.

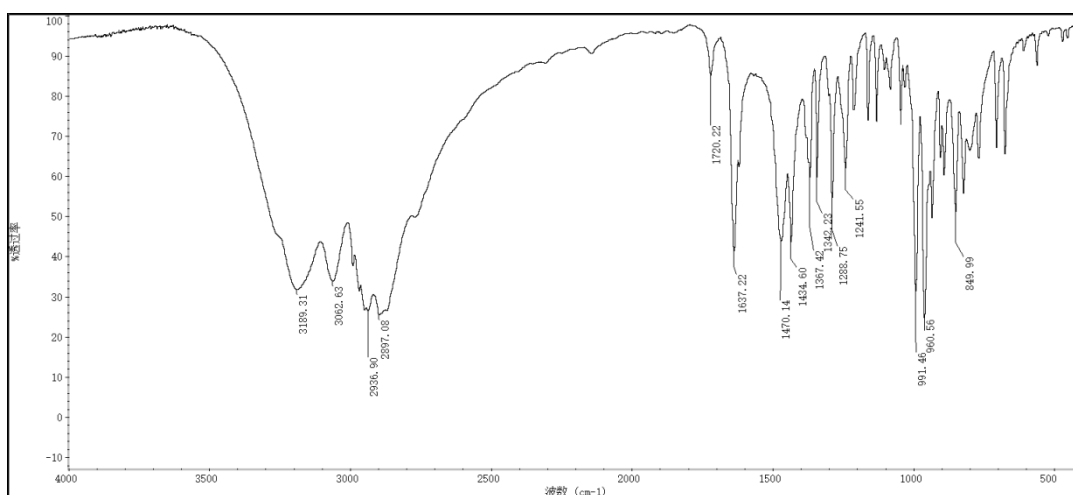

Figure S12. FTIR spectrum of (Z)-verbenone oxime 3.

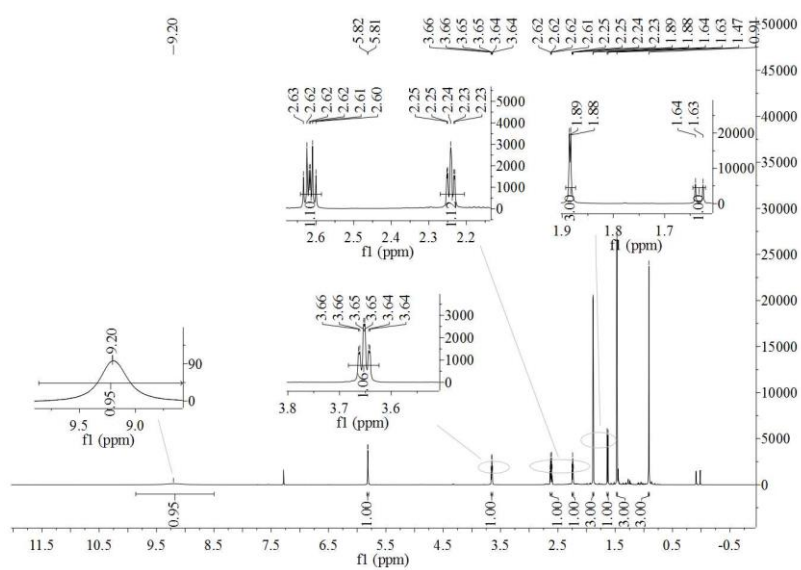

Figure S13. <sup>1</sup>H-NMR spectrum of (Z)-verbenone oxime 3 in CDCl<sub>3</sub>.

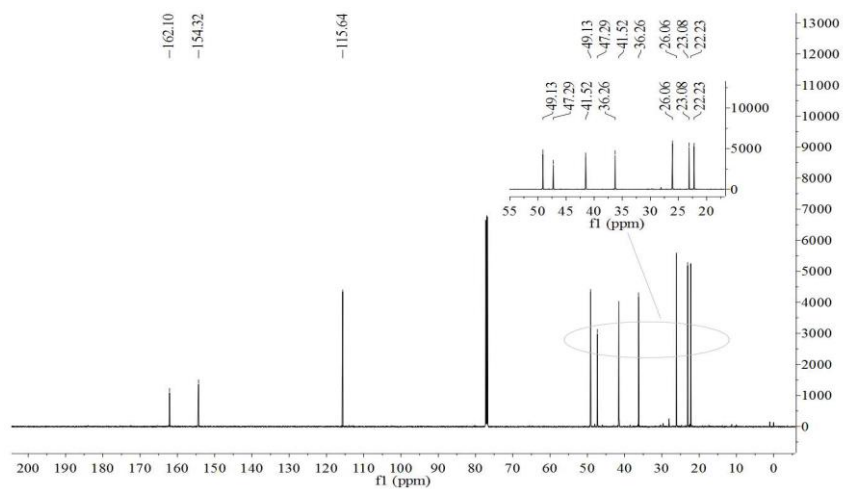

Figure S14.  $^{13}\text{C}$ -NMR spectrum of (Z)-verbenone oxime 3 in  $\text{CDCl}_3$ .

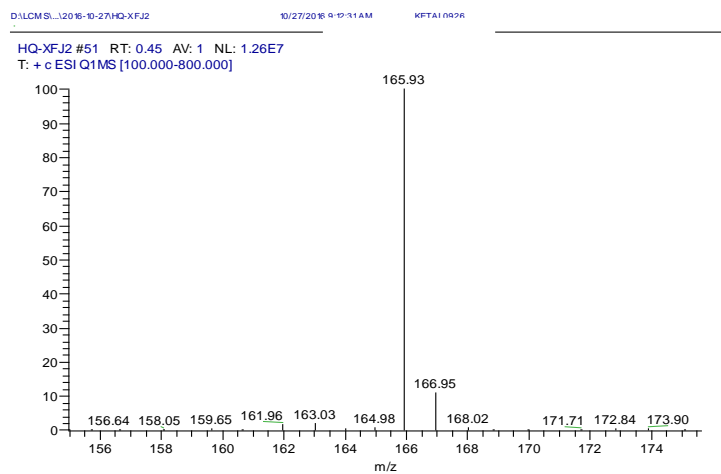

Figure S15. ESI-MS spectrum of (Z)-verbenone oxime 3.

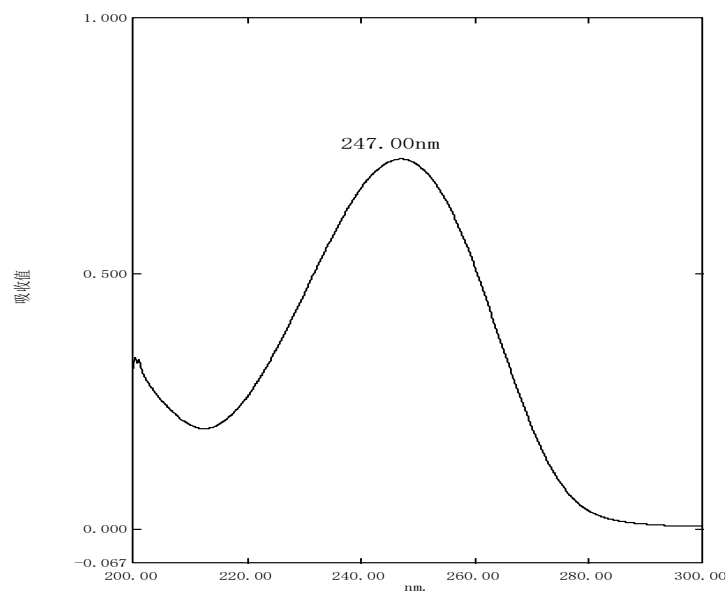

Figure S6. UV-vis spectrum of (E)-verbenone oxime 3 in EtOH.

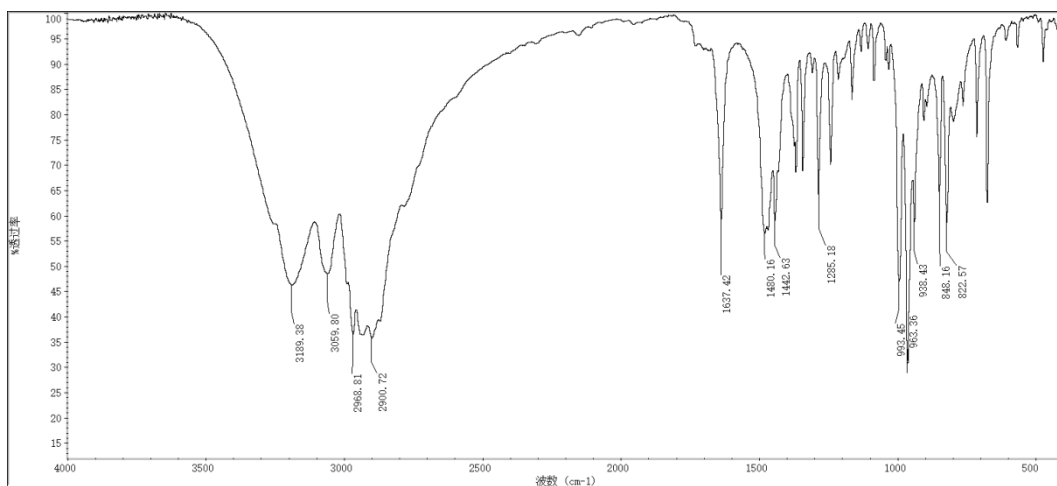

Figure S7. FTIR spectrum of (*E*)-verbenone oxime **3**.

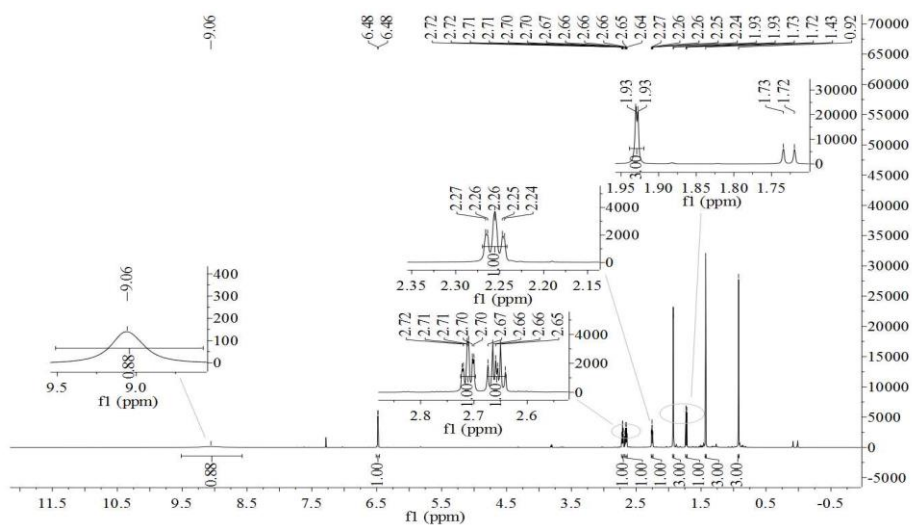

Figure S8.  $^1\text{H-NMR}$  spectrum of (*E*)-verbenone oxime **3** in  $\text{CDCl}_3$ .

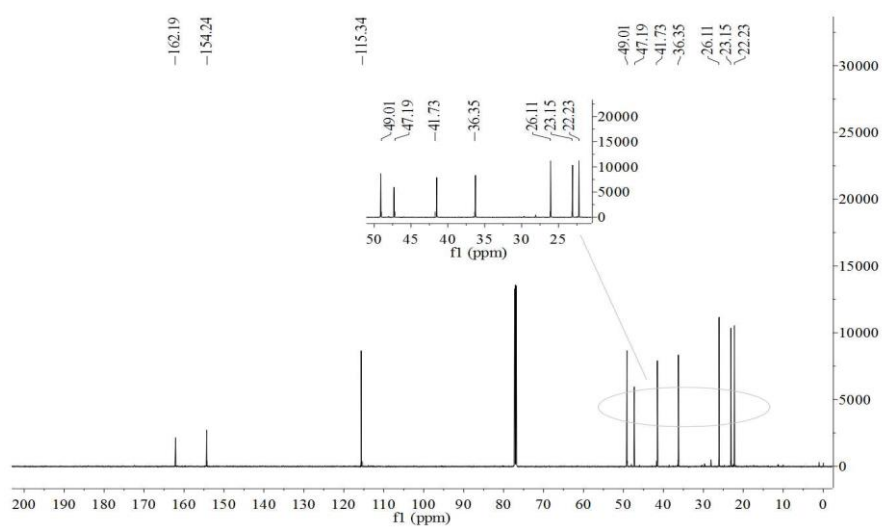

Figure S9.  $^{13}\text{C-NMR}$  spectrum of (*E*)-verbenone oxime **3** in  $\text{CDCl}_3$ .

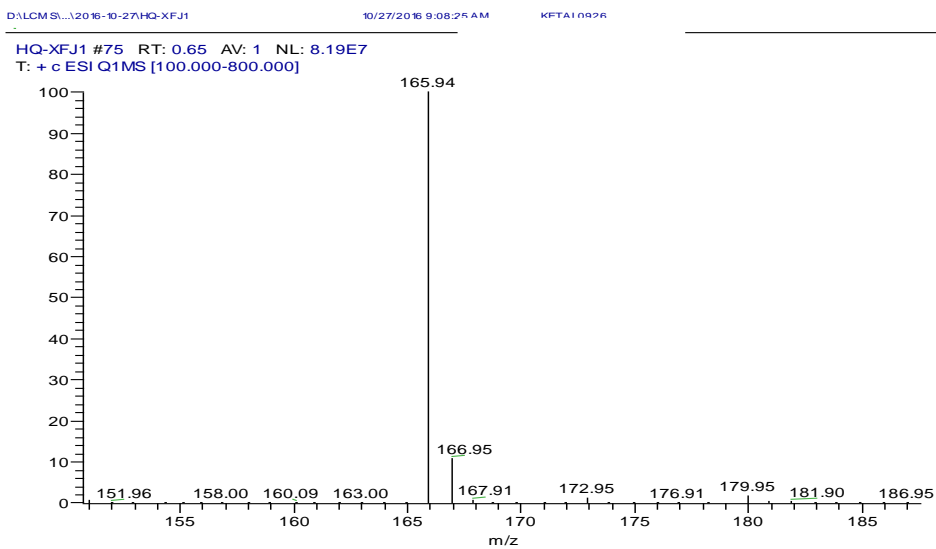

Figure S10. ESI-MS spectrum of (*E*)-verbenone oxime **3**.

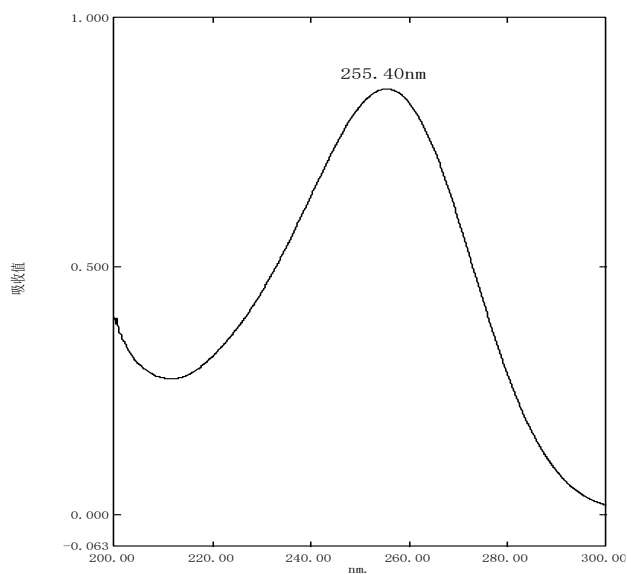

Figure S23. UV-vis spectrum of (*Z*)-verbenone *O*-*n*-pentanoyl oxime **4a** in EtOH.

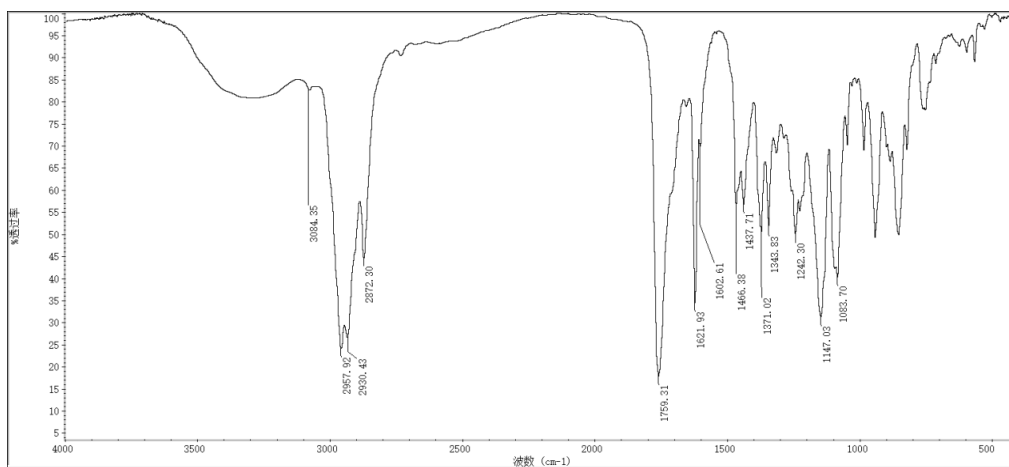

Figure S24. FTIR spectrum of (*Z*)-verbenone *O*-*n*-pentanoyl oxime **4a**.

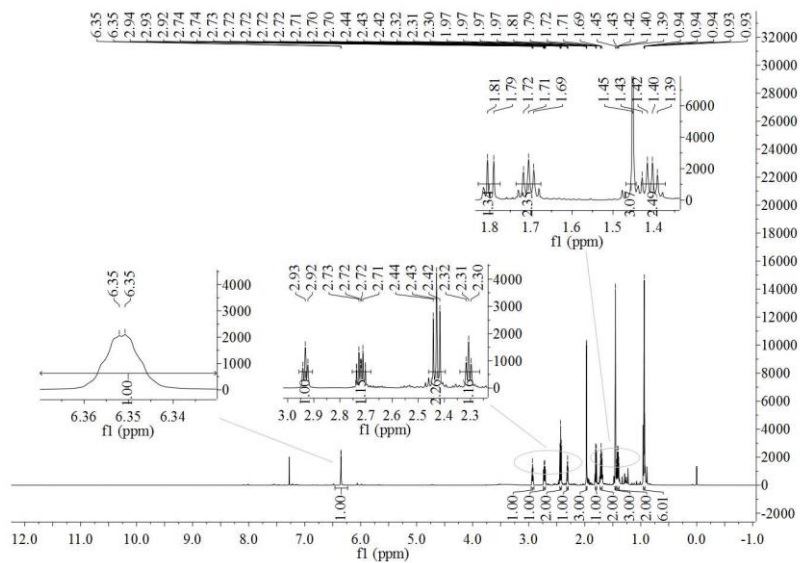

**Figure S25.** <sup>1</sup>H-NMR spectrum of (Z)-verbenone O-*n*-pentanoyl oxime 4a in CDCl<sub>3</sub>.

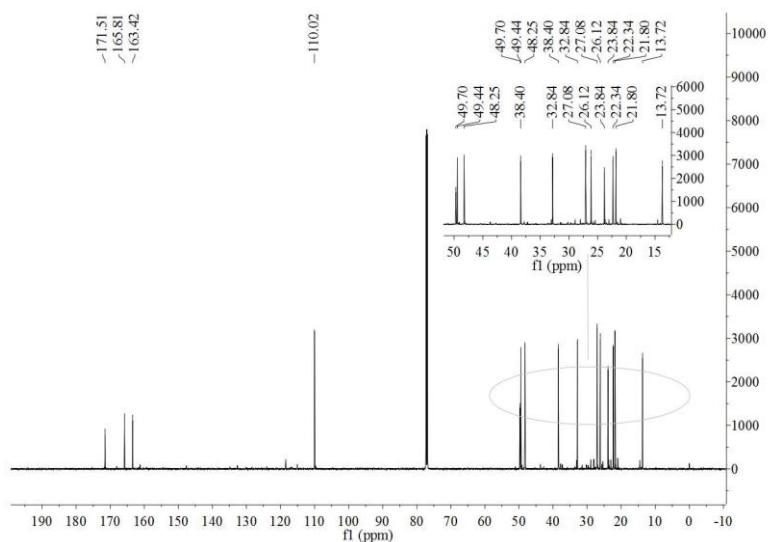

**Figure S26.** <sup>13</sup>C-NMR spectrum of (Z)-verbenone O-*n*-pentanoyl oxime in CDCl<sub>3</sub>.

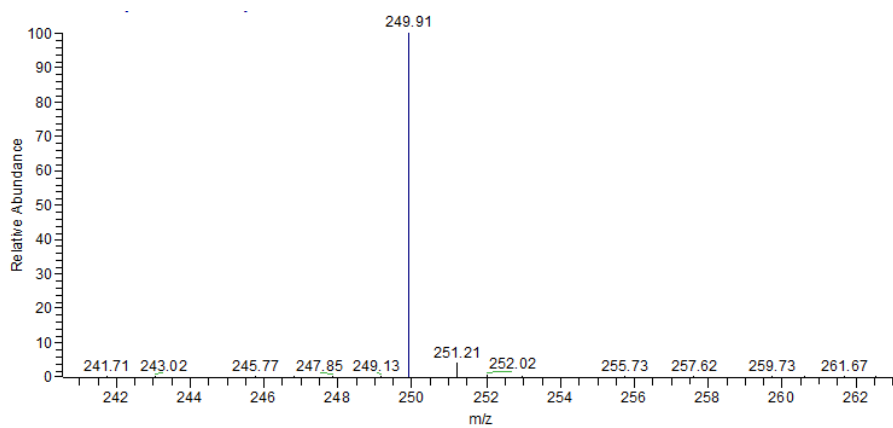

**Figure S27.** ESI-MS spectrum of (Z)-verbenone O-*n*-pentanoyl oxime 4a.

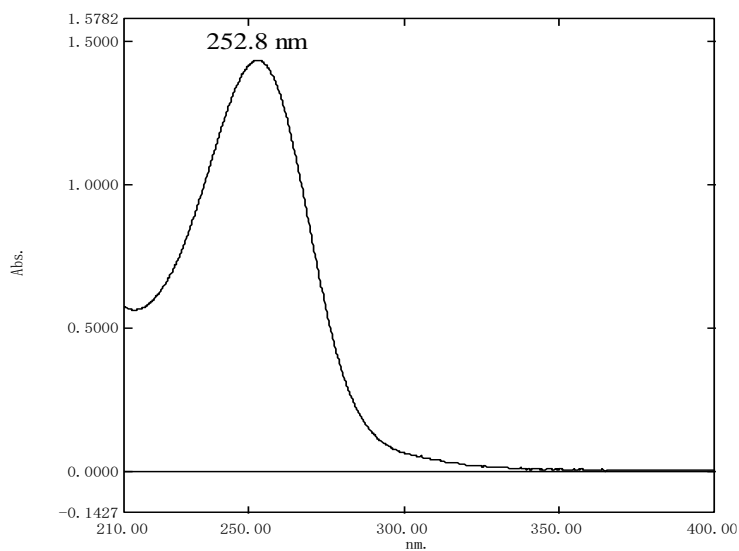

Figure S18. UV-vis spectrum of (*E*)-verbenone *O*-*n*-pentanoyl oxime **4a** in EtOH.

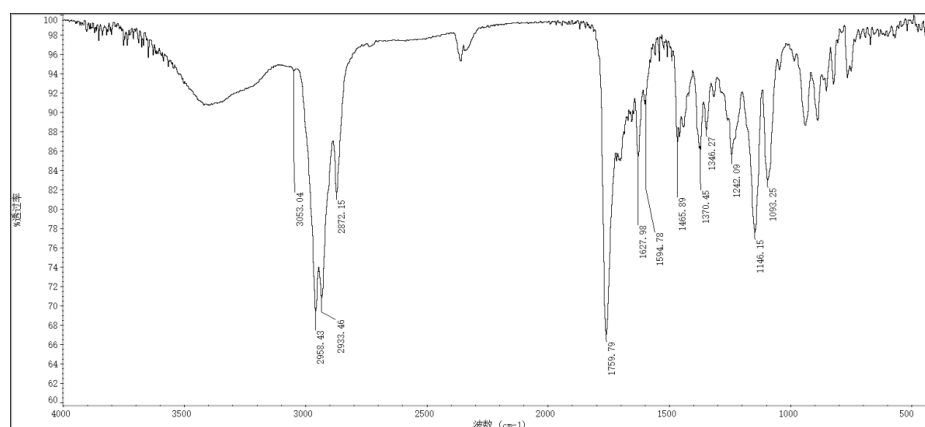

Figure S19. FTIR spectrum of (*E*)-verbenone *O*-*n*-pentanoyl oxime **4a**.

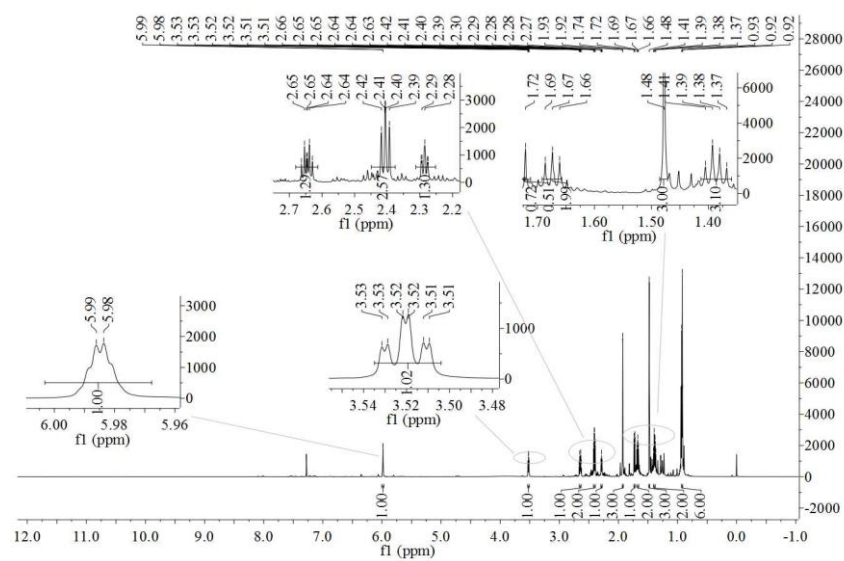

Figure S20. <sup>1</sup>H-NMR spectrum of (*E*)-verbenone *O*-*n*-pentanoyl oxime **4a** in CDCl<sub>3</sub>.



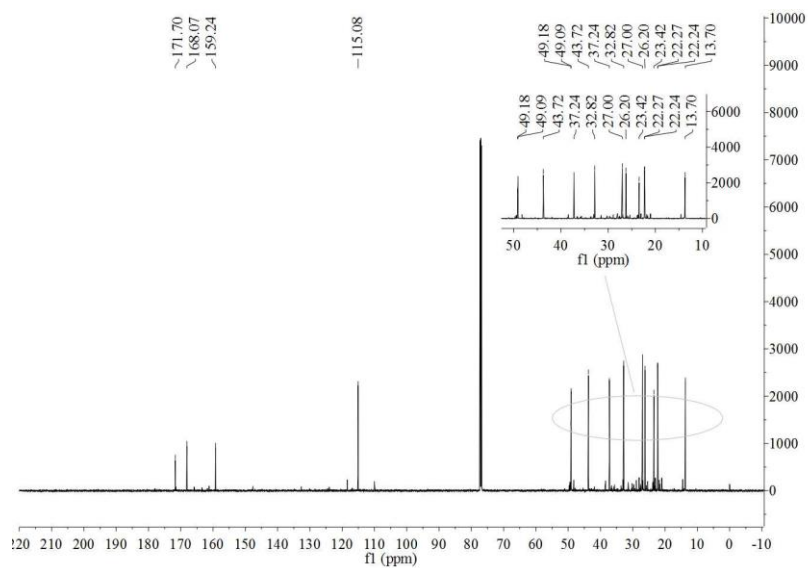

Figure S21.  $^{13}\text{C}$ -NMR spectrum of (*E*)-verbenone *O*-*n*-pentanoyl oxime **4a** in  $\text{CDCl}_3$ .

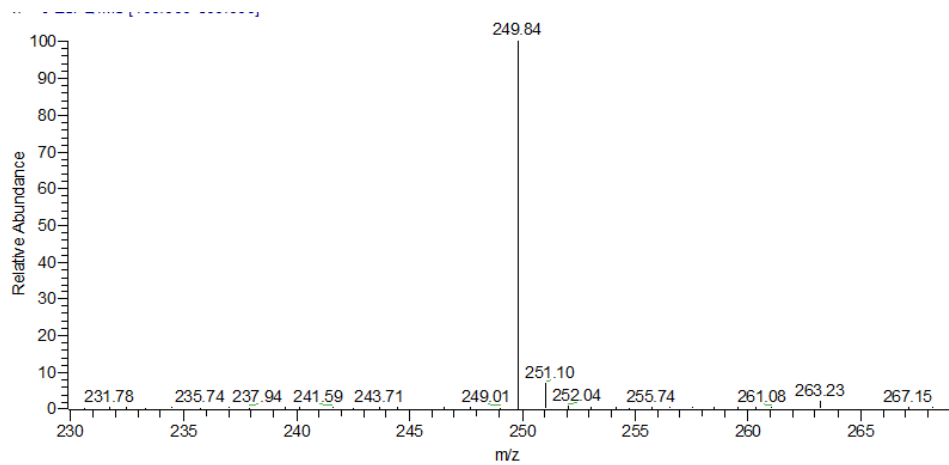

Figure S22. ESI-MS spectrum of (*E*)-verbenone *O*-*n*-pentanoyl oxime **4a**.

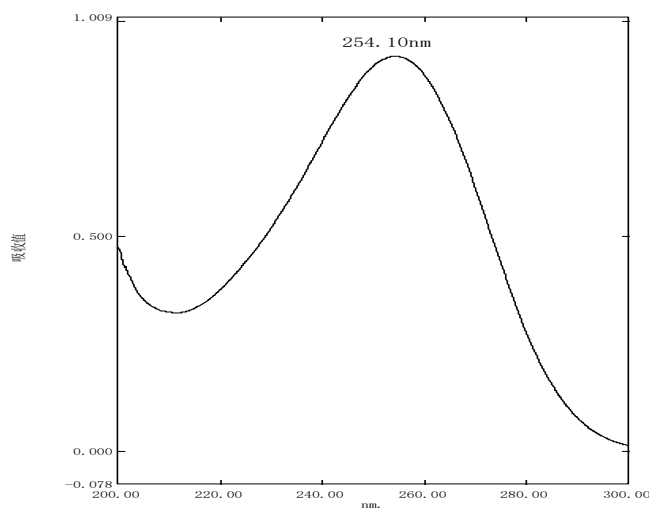

Figure S33. UV-vis spectrum of (*Z*)-verbenone *O*-*n*-hexanoyl oxime **4b** in  $\text{EtOH}$ .

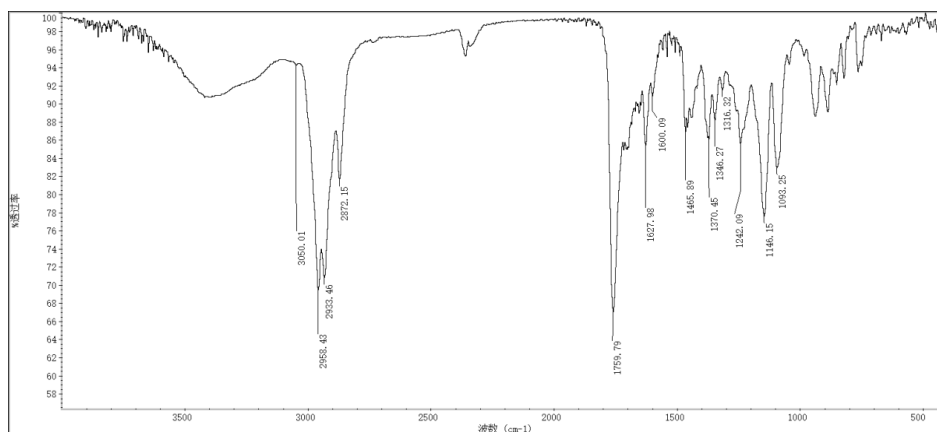

Figure S34. FTIR spectrum of (Z)-verbenone O-*n*-hexanoyl oxime **4b**.

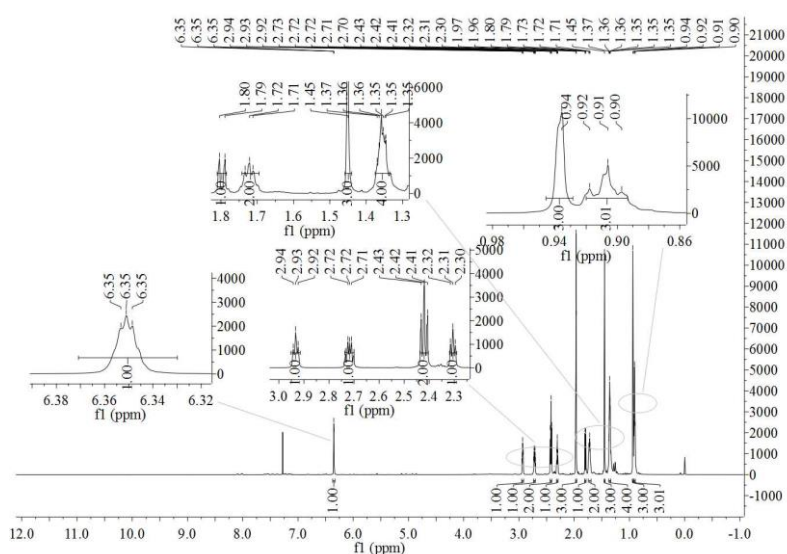

Figure S35. <sup>1</sup>H-NMR spectrum of (Z)-verbenone O-*n*-hexanoyl oxime **4b** in CDCl<sub>3</sub>.

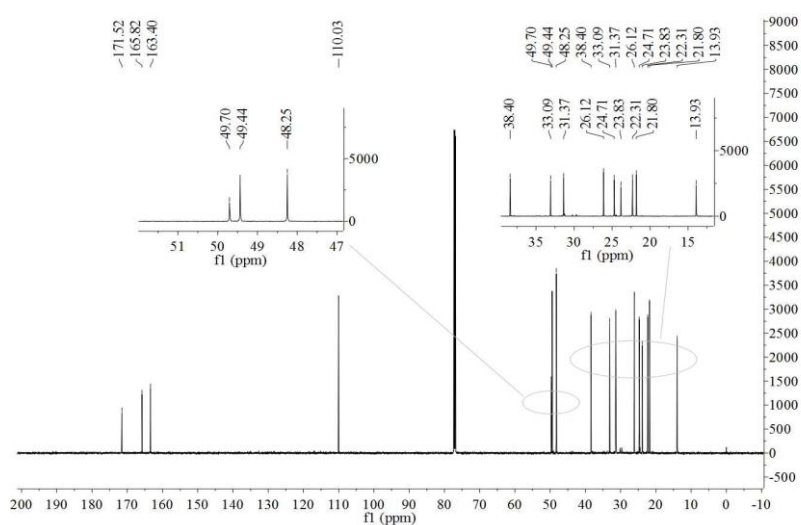

Figure S36. <sup>13</sup>C-NMR spectrum of (Z)-verbenone O-*n*-hexanoyl oxime **4b** in CDCl<sub>3</sub>.

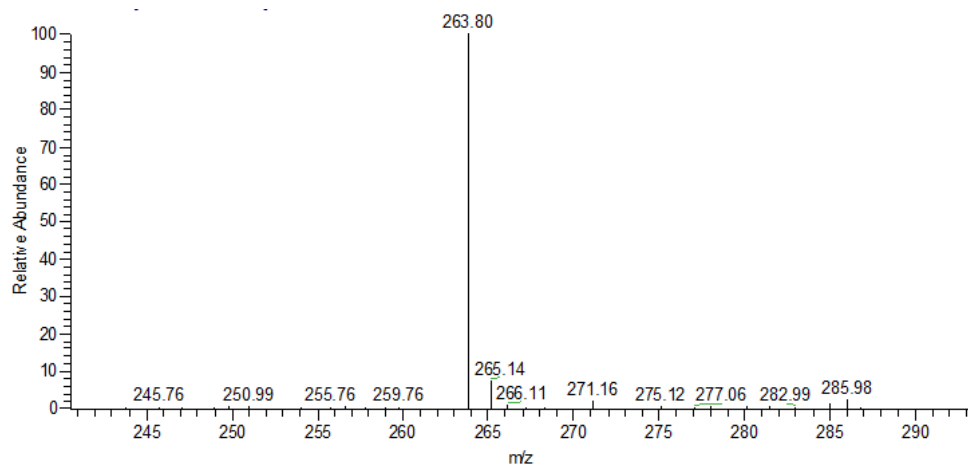

Figure S37. ESI-MS spectrum of (*Z*)-verbenone *O*-*n*-hexanoyl oxime **4b**.

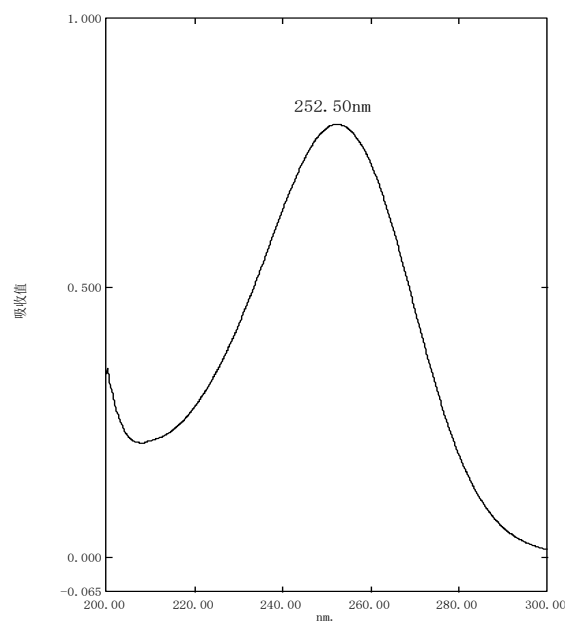

Figure S28. UV-vis spectrum of (*E*)-verbenone *O*-*n*-hexanoyl oxime **4b** in EtOH.

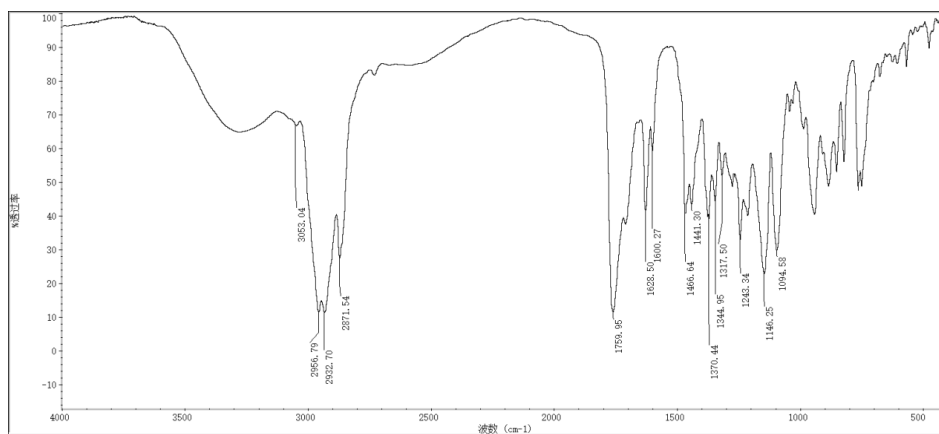

Figure S29. FTIR spectrum of (*E*)-verbenone *O*-*n*-hexanoyl oxime **4b**.

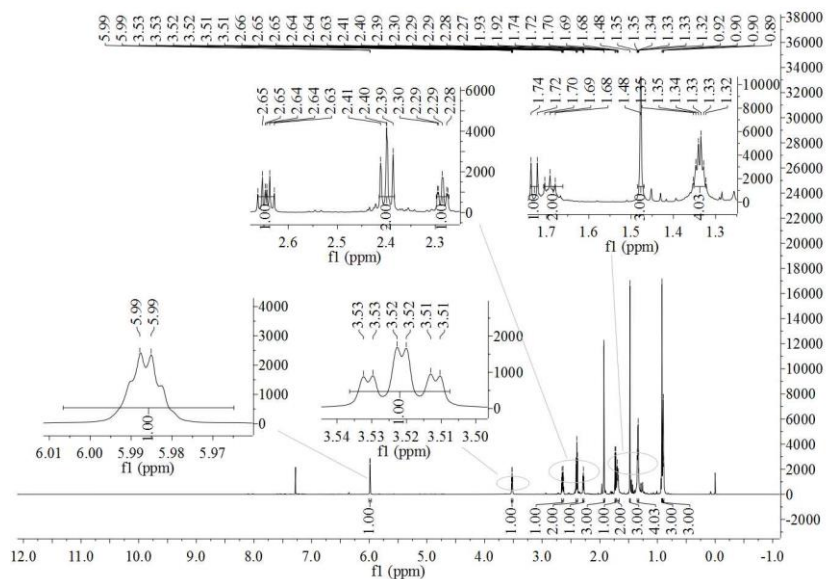

Figure S30.  $^1\text{H-NMR}$  spectrum of  $(E)$ -verbenone  $O$ - $n$ -hexanoyl oxime **4b** in  $\text{CDCl}_3$ .

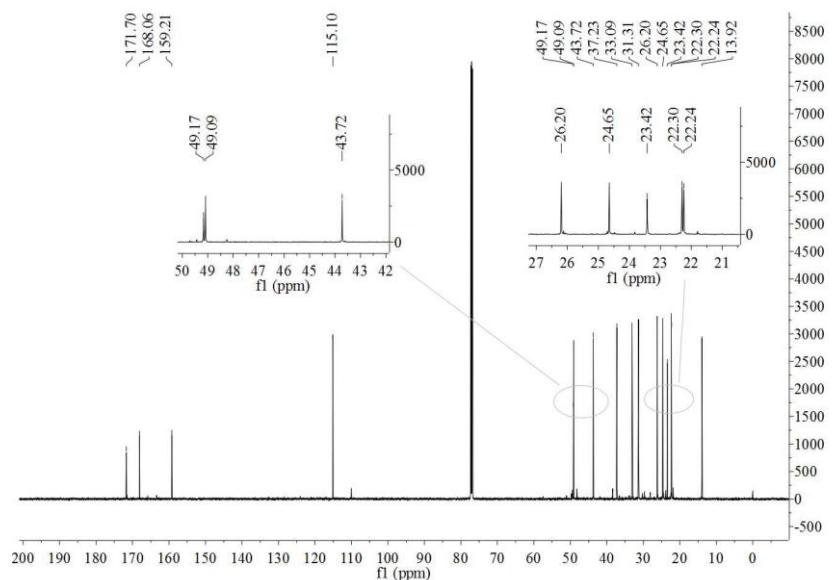

Figure S31.  $^{13}\text{C-NMR}$  spectrum of  $(E)$ -verbenone  $O$ - $n$ -hexanoyl oxime **4b** in  $\text{CDCl}_3$ .

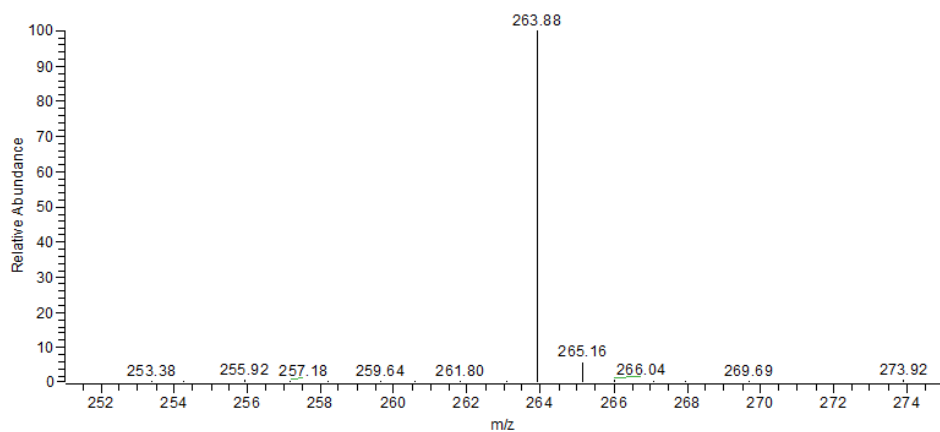

Figure S32. ESI-MS spectrum of  $(E)$ -verbenone  $O$ - $n$ -hexanoyl oxime **4b**.

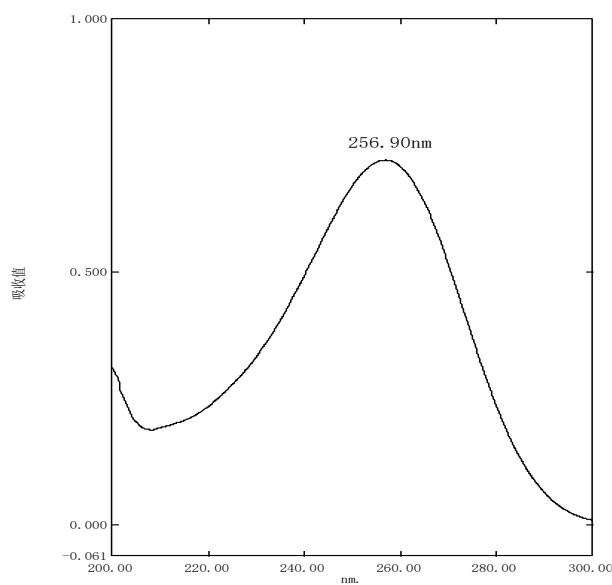

Figure S43. UV-vis spectrum of (Z)-verbenone O-cyclopentylcarbonyl oxime **4c** in EtOH.

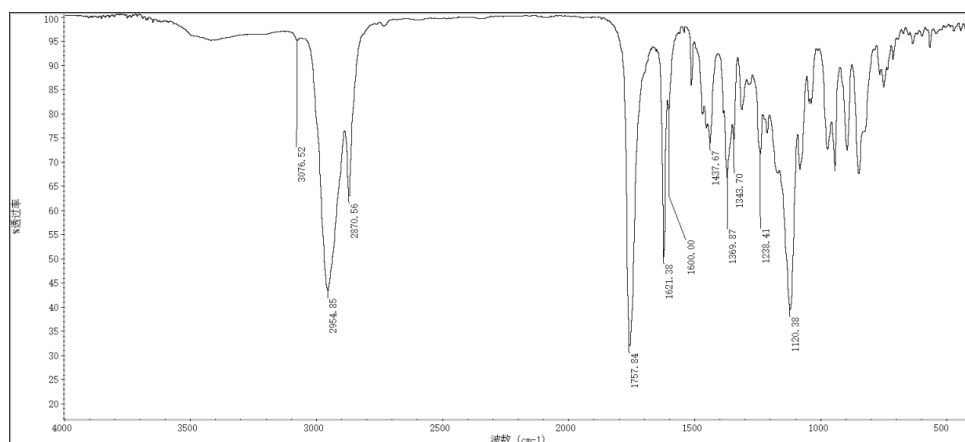

Figure S44. FTIR spectrum of (Z)-verbenone O-cyclopentylcarbonyl oxime **4c**.

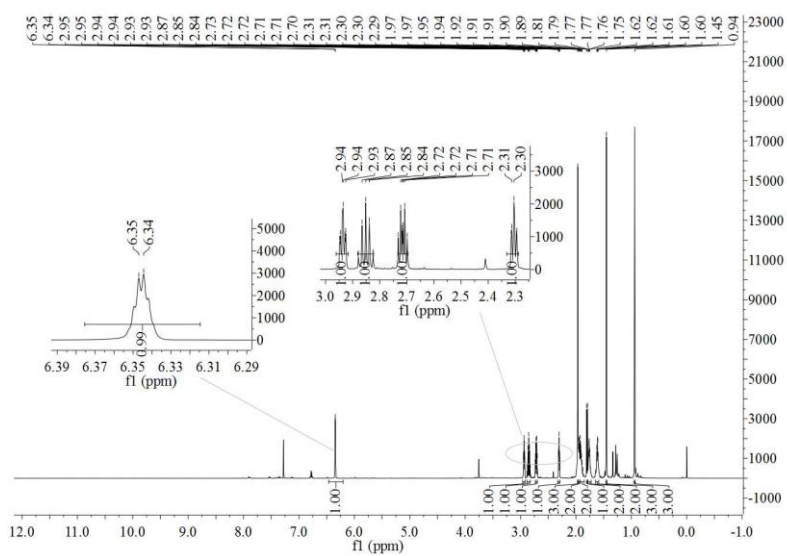

Figure S45.  $^1\text{H-NMR}$  spectrum of (Z)-verbenone O-cyclopentylcarbonyl oxime **4c** in  $\text{CDCl}_3$ .

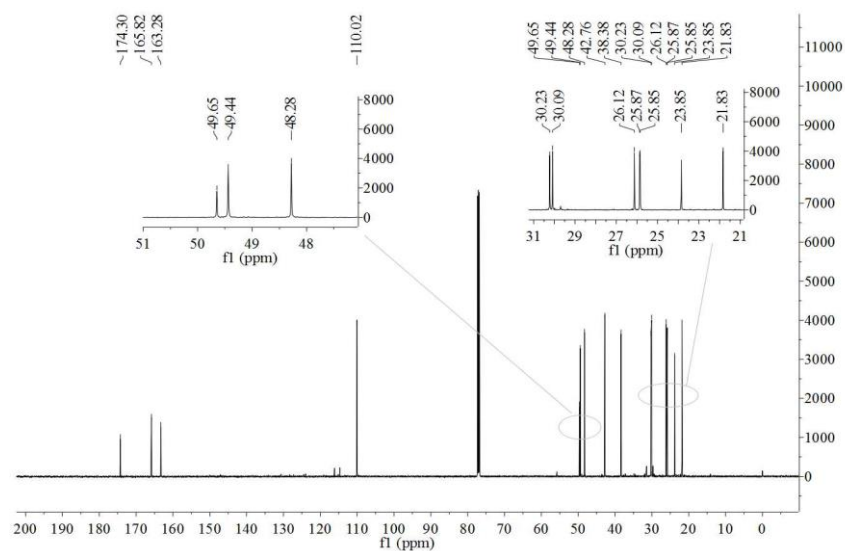

**Figure S46.** <sup>13</sup>C-NMR spectrum of (Z)-verbenone O-cyclopentylcarbonyl oxime 4c in CDCl<sub>3</sub>.

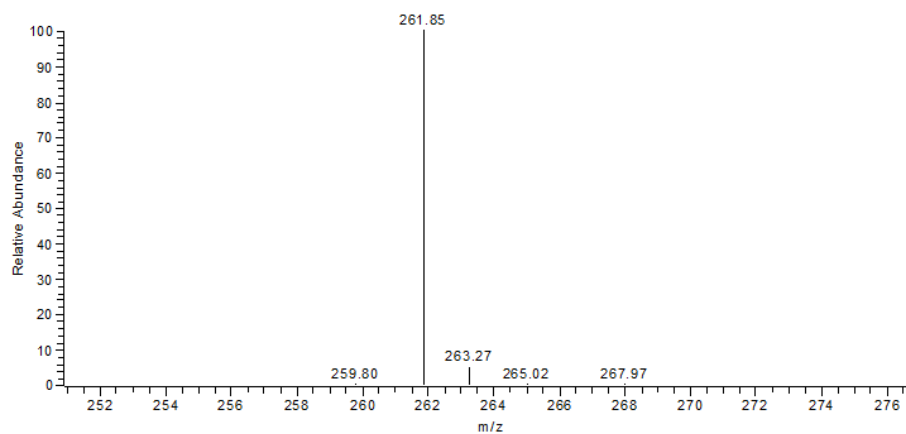

**Figure S47.** ESI-MS spectrum of (Z)-verbenone O-cyclopentylcarbonyl oxime 4c.

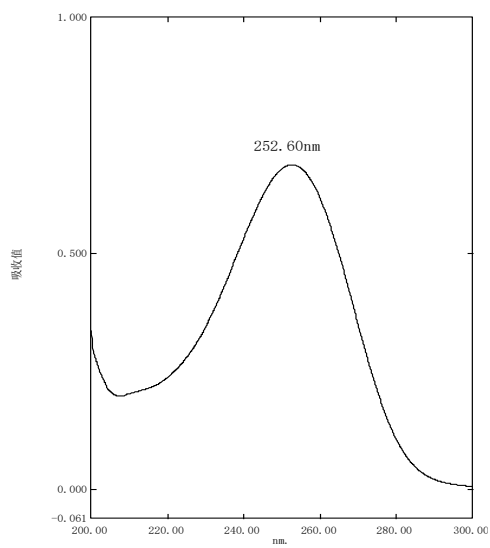

**Figure S38.** UV-vis spectrum of (E)-verbenone O-cyclopentylcarbonyl oxime 4c in EtOH.

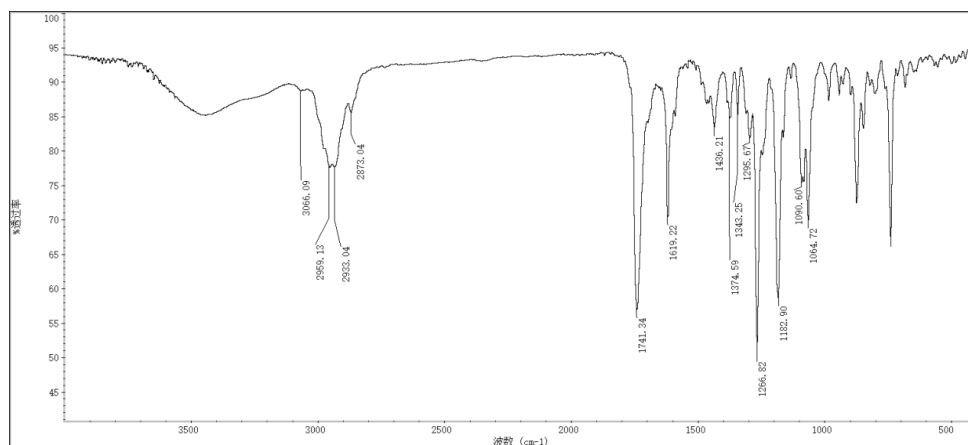

Figure S39. FTIR spectrum of (*E*)-verbenone O-cyclopentylcarbonyl oxime **4c**.

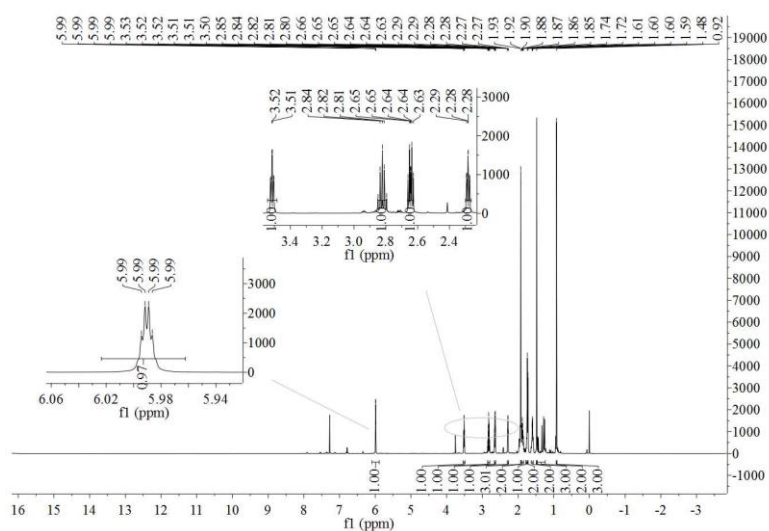

Figure S40. <sup>1</sup>H-NMR spectrum of (*E*)-verbenone O-cyclopentylcarbonyl oxime **4c** in CDCl<sub>3</sub>.

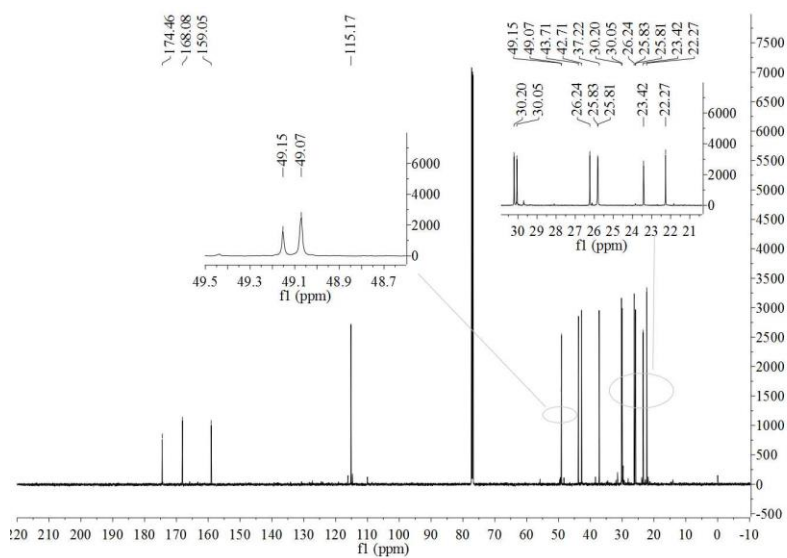

Figure S41. <sup>13</sup>C-NMR spectrum of (*E*)-verbenone O-cyclopentylcarbonyl oxime **4c** in CDCl<sub>3</sub>.

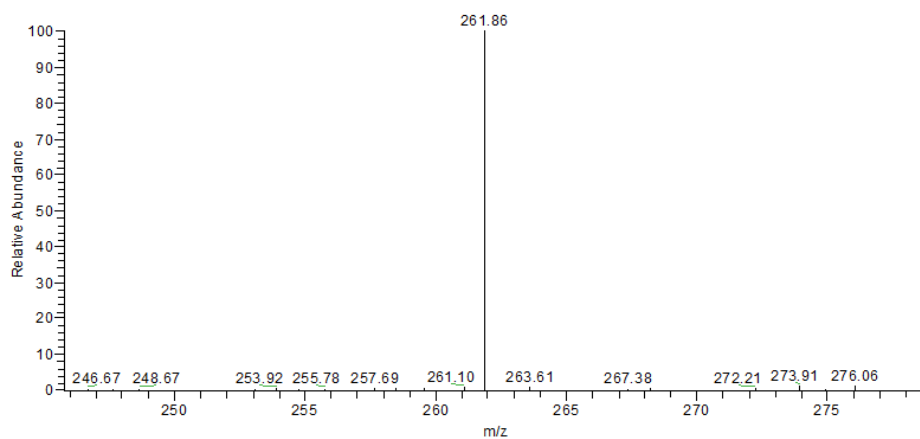

Figure S42. ESI-MS spectrum of (*E*)-verbenone O-cyclopentylcarbonyl oxime **4c**.

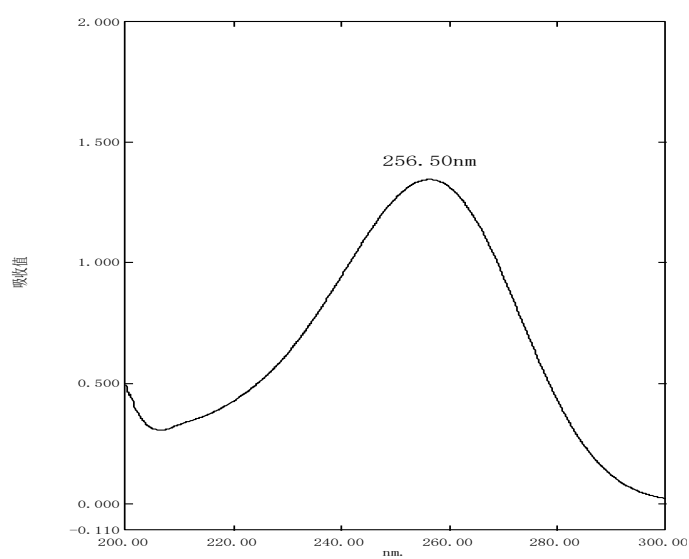

Figure S53. UV-vis spectrum of (*Z*)-verbenone O-cyclohexylcarbonyl oxime **4d** in EtOH.

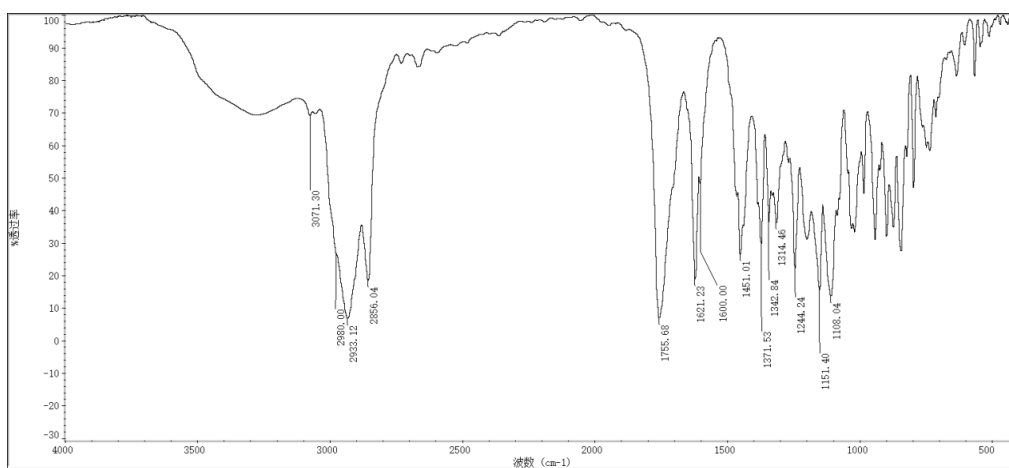

Figure S54. FTIR spectrum of (*Z*)-verbenone O-cyclohexylcarbonyl oxime **4d**.



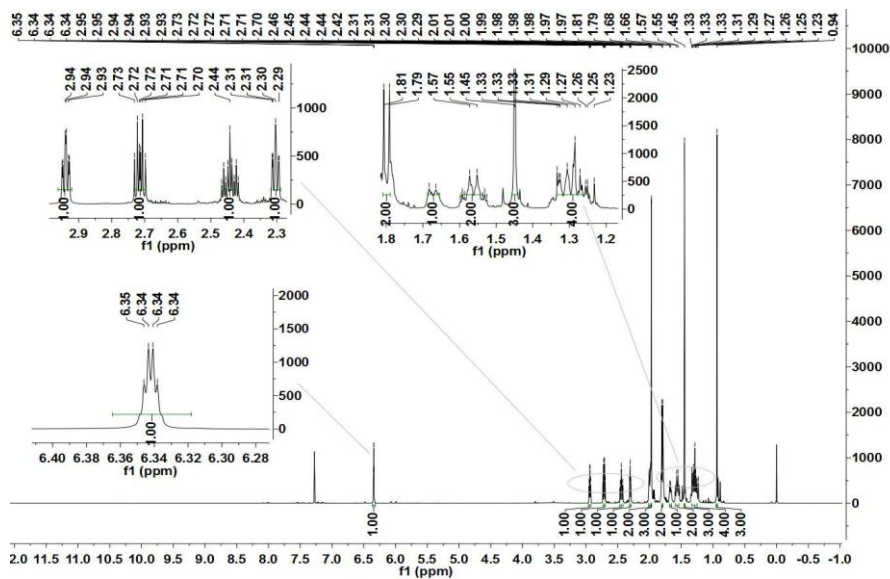

Figure S55.  $^1\text{H-NMR}$  spectrum of (*Z*)-verbenone O-cyclohexylcarbonyl oxime **4d** in  $\text{CDCl}_3$ .

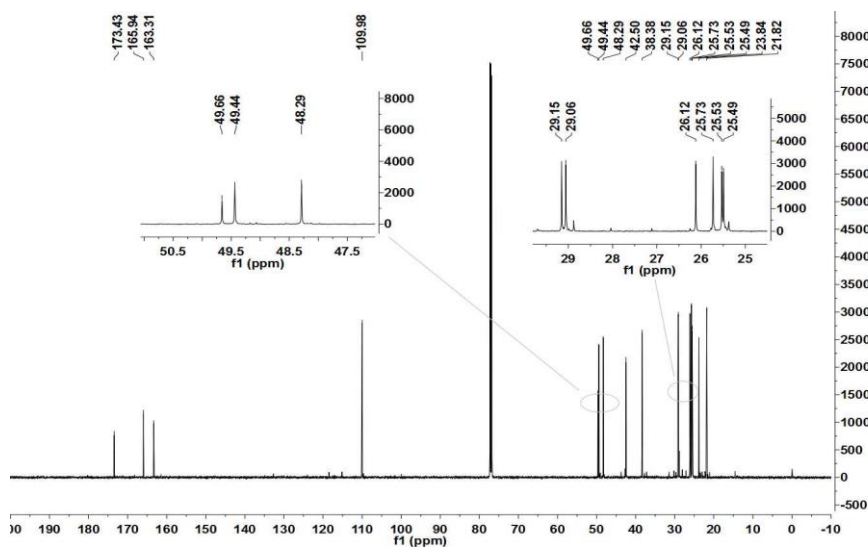

Figure S56.  $^{13}\text{C-NMR}$  spectrum of (*Z*)-verbenone O-cyclohexylcarbonyl oxime **4d** in  $\text{CDCl}_3$ .

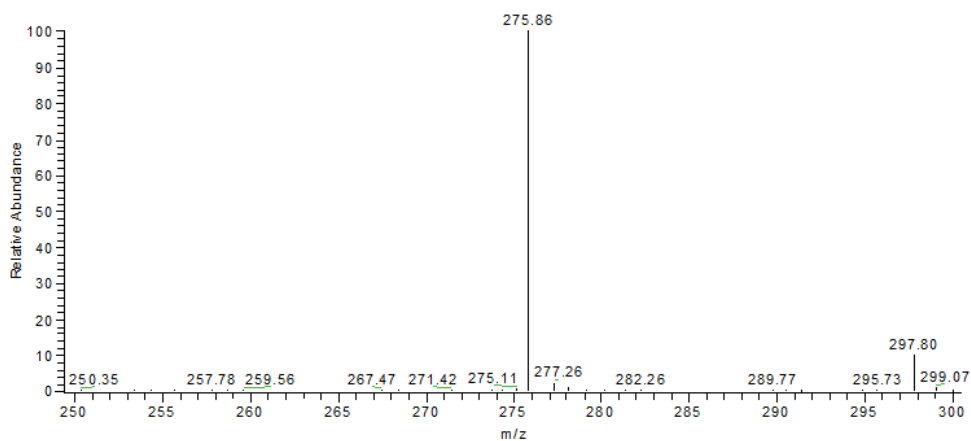

Figure S57. ESI-MS spectrum of (*Z*)-verbenone O-cyclohexylcarbonyl oxime **4d**.

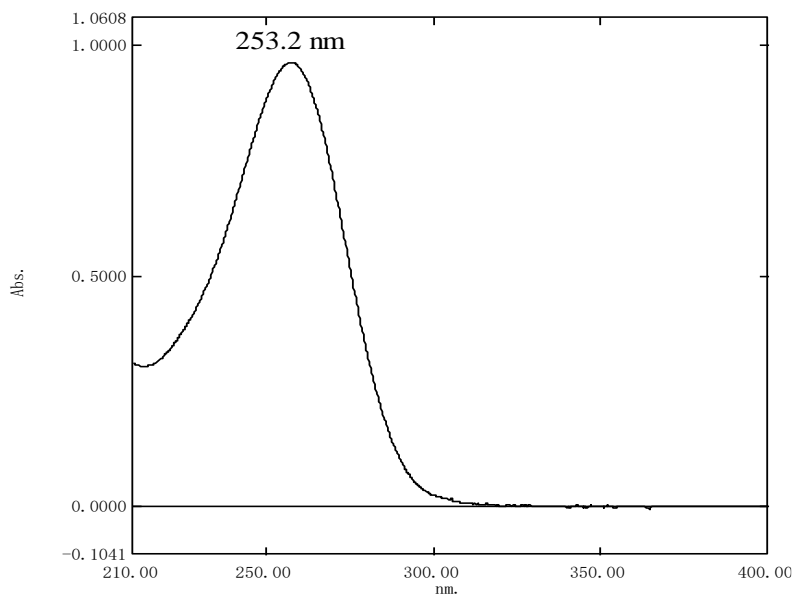

Figure S48. UV-vis spectrum of (*E*)-verbenone O-cyclohexylcarbonyl oxime **4d** in EtOH.

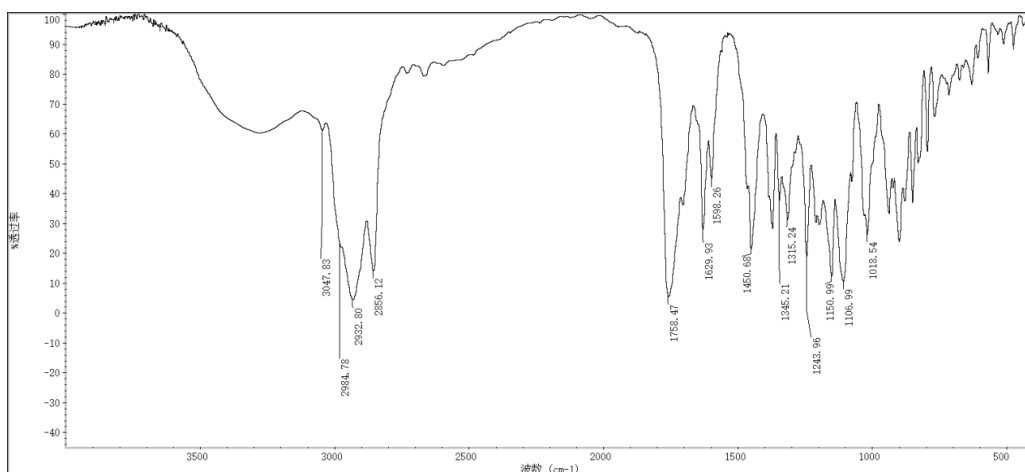

Figure S49. FTIR spectrum of (*E*)-verbenone O-cyclohexylcarbonyl oxime **4d**.

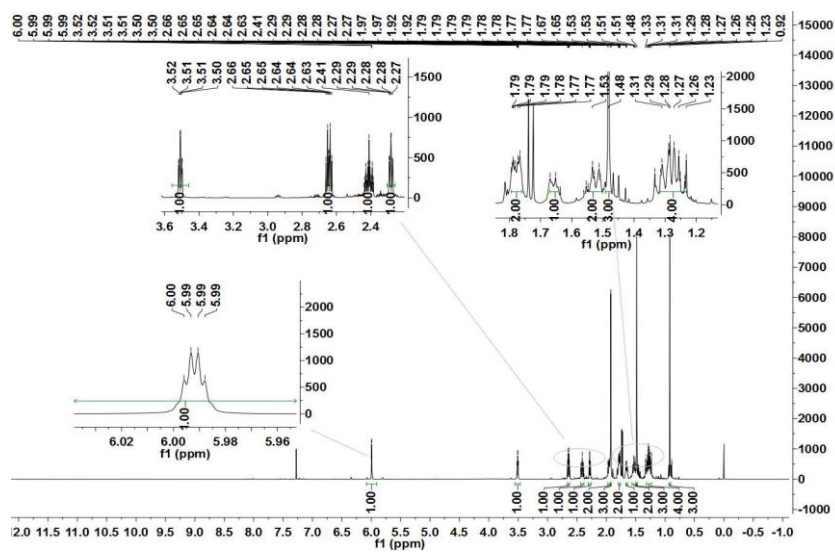

Figure S50. <sup>1</sup>H-NMR spectrum of (*E*)-verbenone O-cyclohexylcarbonyl oxime **4d** in CDCl<sub>3</sub>.

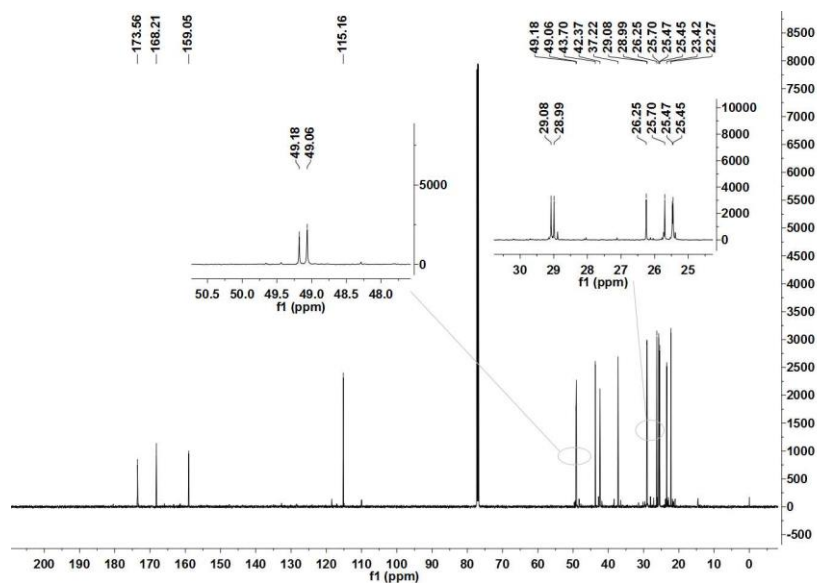

Figure S51.  $^{13}\text{C}$ -NMR spectrum of (*E*)-verbenone O-cyclohexylcarbonyl oxime **4d** in  $\text{CDCl}_3$ .

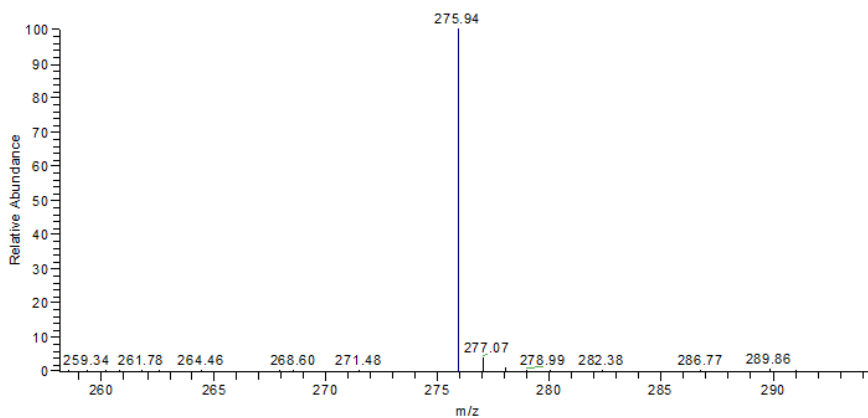

Figure S52. ESI-MS spectrum of (*E*)-verbenone O-cyclohexylcarbonyl oxime **4d**.

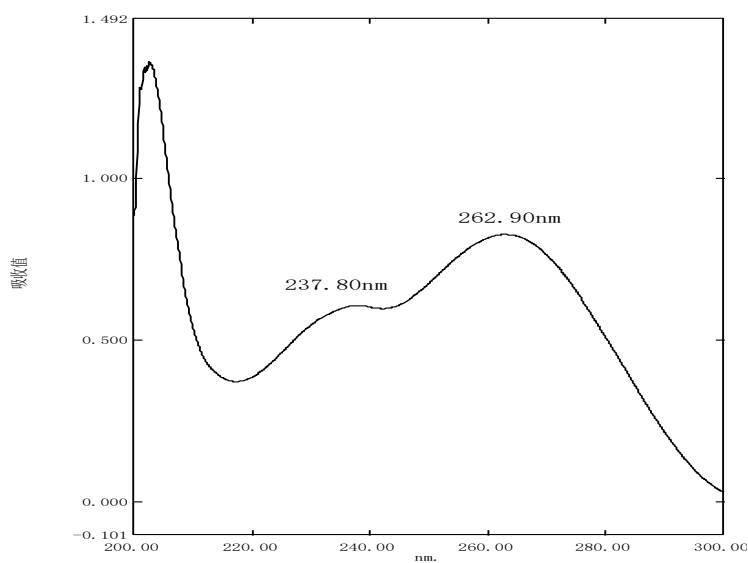

Figure S63. UV-vis spectrum of (*Z*)-verbenone O-(2'-methylbenzoyl) oxime **4e** in EtOH.

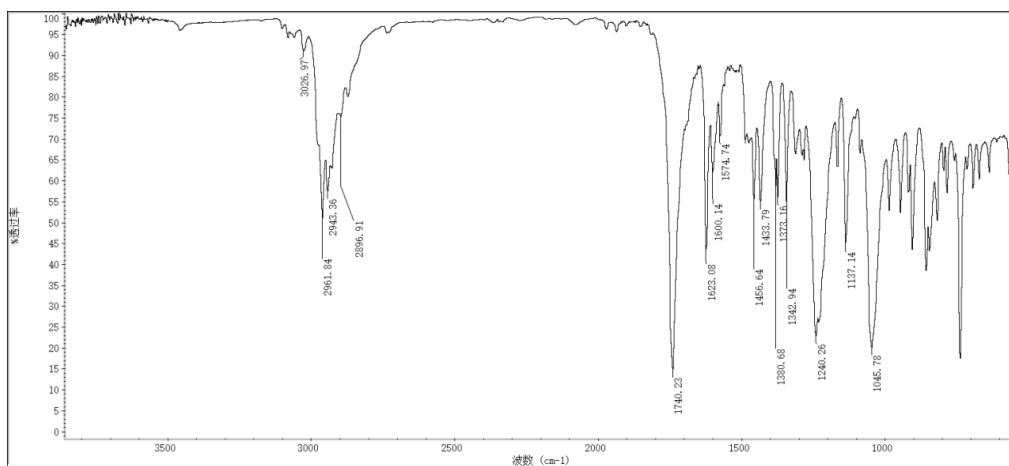

Figure S64. FTIR spectrum of (Z)-verbenone O-(2'-methylbenzoyl) oxime **4e**.

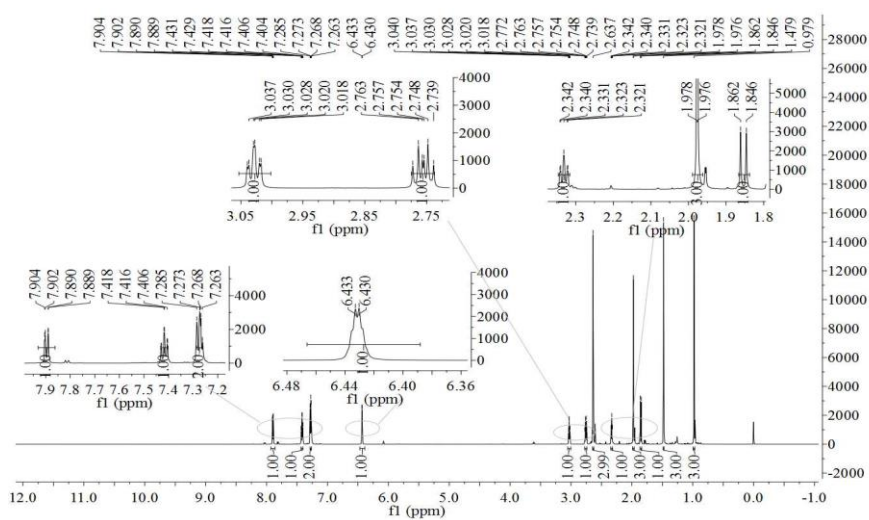

Figure S65.  $^1\text{H-NMR}$  spectrum of (Z)-verbenone O-(2'-methylbenzoyl) oxime **4e** in  $\text{CDCl}_3$ .

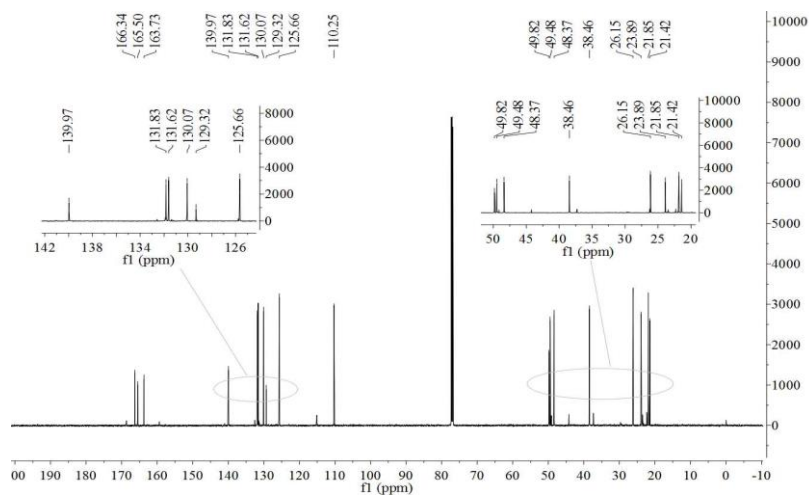

Figure S66.  $^{13}\text{C-NMR}$  spectrum of (Z)-verbenone O-(2'-methylbenzoyl) oxime **4e** in  $\text{CDCl}_3$ .

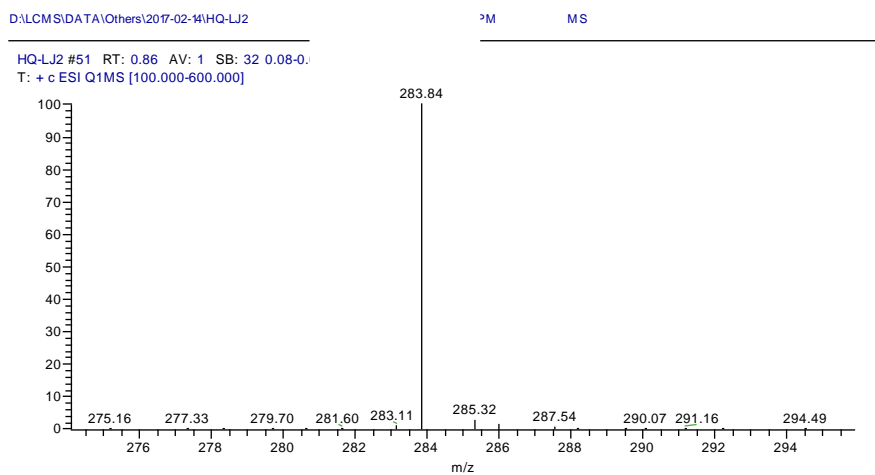

+

Figure S67. ESI-MS spectrum of (*Z*)-verbenone O-(2'-methylbenzoyl) oxime **4e**.

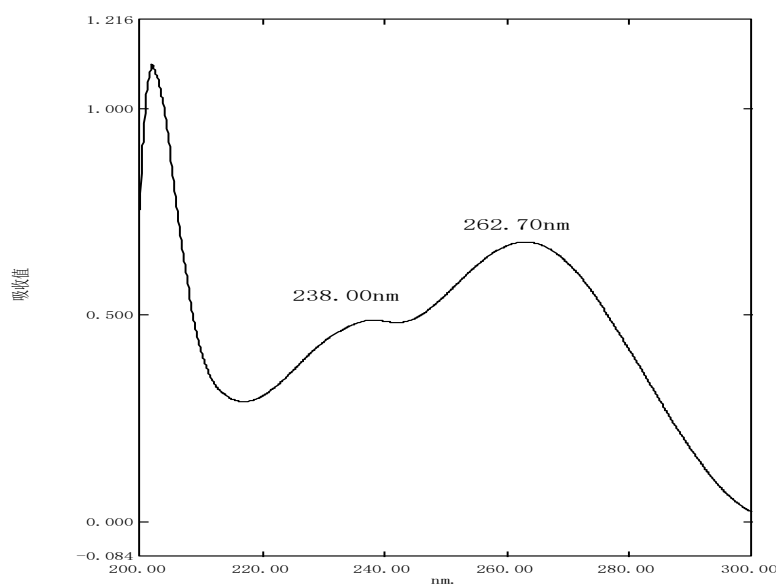

Figure S58. UV-vis spectrum of (*E*)-verbenone O-(2'-methylbenzoyl) oxime **4e** in EtOH.

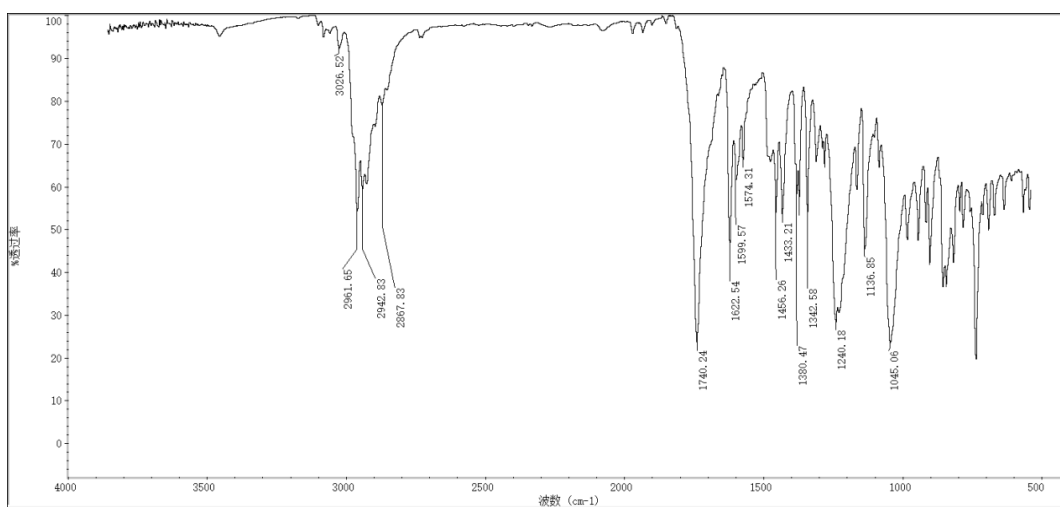

Figure S59. FTIR spectrum of (*E*)-verbenone O-(2'-methylbenzoyl) oxime **4e**.

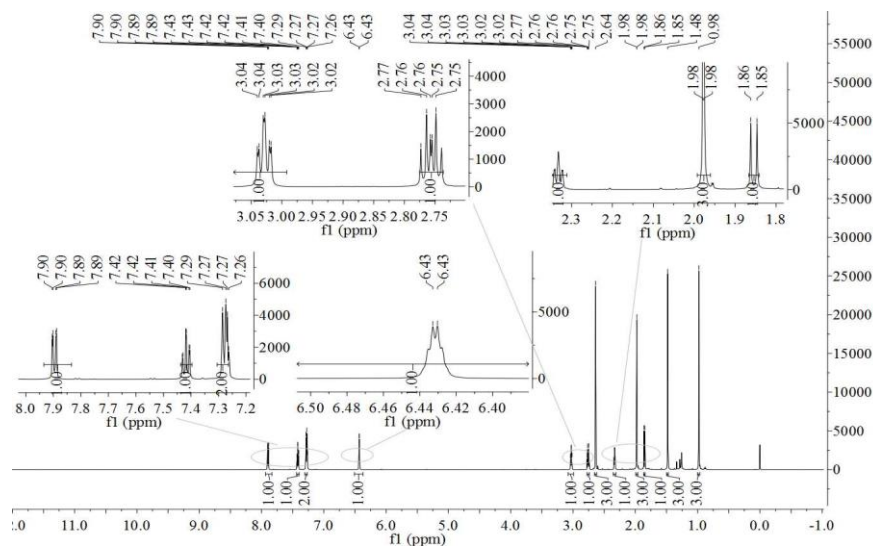

Figure S60.  $^1\text{H-NMR}$  spectrum of *(E)*-verbenone O-(2'-methylbenzoyl) oxime **4e** in  $\text{CDCl}_3$ .

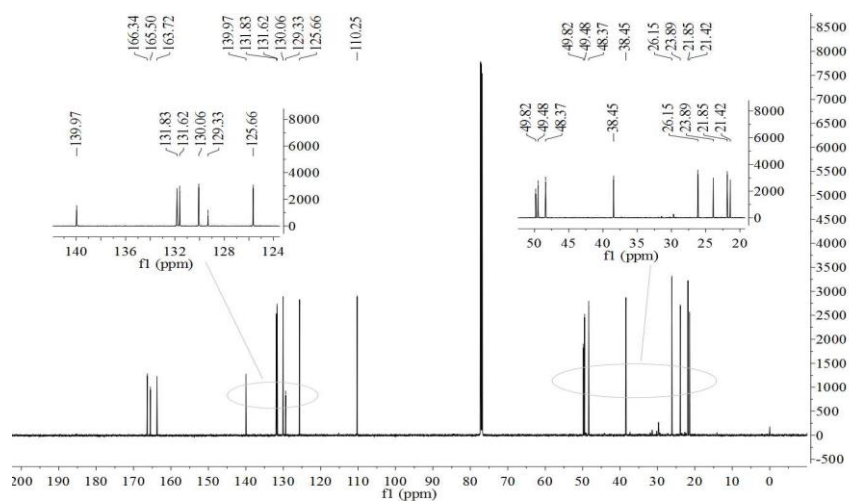

Figure S61.  $^{13}\text{C-NMR}$  spectrum of *(E)*-verbenone O-(2'-methylbenzoyl) oxime **4e** in  $\text{CDCl}_3$ .

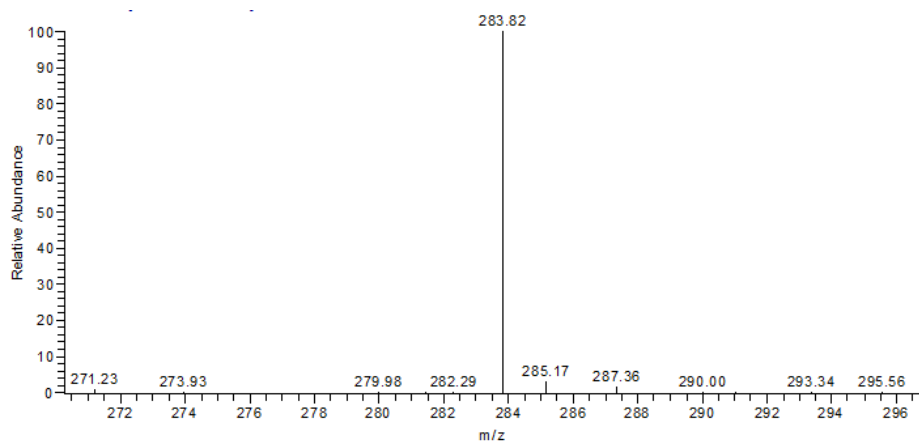

Figure S62. ESI-MS spectrum of *(E)*-verbenone O-(2'-methylbenzoyl) oxime **4e**.

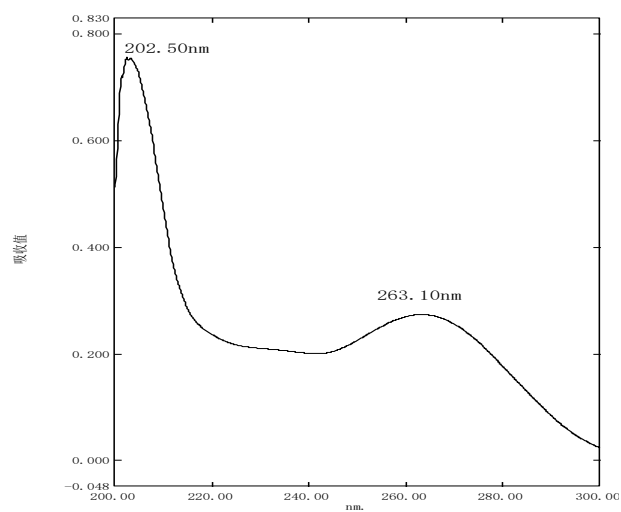

Figure S73. UV-vis spectrum of (Z)-verbenone O-(2'-chlorobenzoyl) oxime **4f** in EtOH.

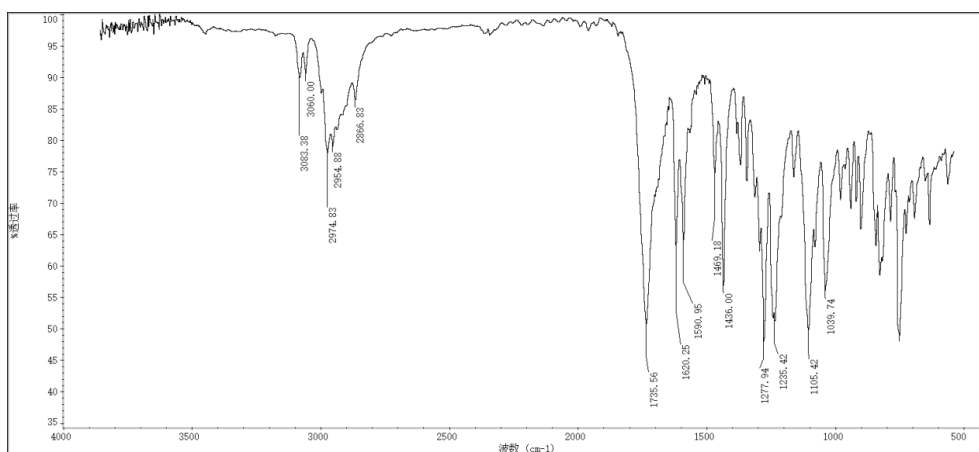

Figure S74. FTIR spectrum of (Z)-verbenone O-(2'-chlorobenzoyl) oxime **4f**.

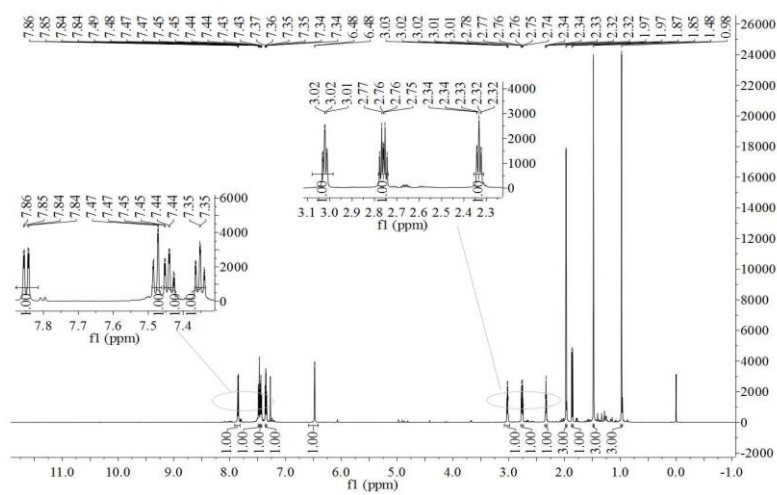

Figure S75. <sup>1</sup>H-NMR spectrum of (Z)-verbenone O-(2'-chlorobenzoyl) oxime **4f** in CDCl<sub>3</sub>.

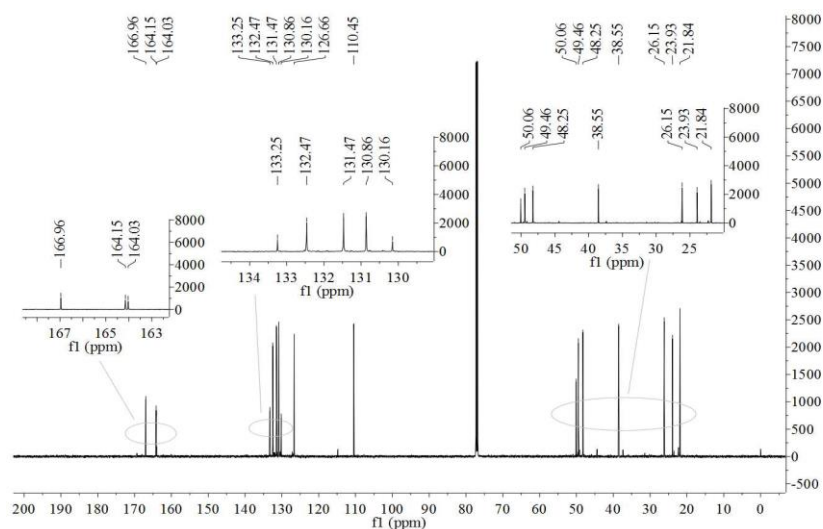

Figure S76.  $^{13}\text{C}$ -NMR spectrum of (Z)-verbenone O-(2'-chlorobenzoyl) oxime in  $\text{CDCl}_3$ .

D:\LCM\SDATA\Others\2017-02-14\HQ-LL2

3/22/2017 4:24:01PM

MS

HQ-LL2 #30-36 RT: 0.50-0.60 AV: 7 SB: 14

T: + c ESI Q1MS [100.000-600.000]

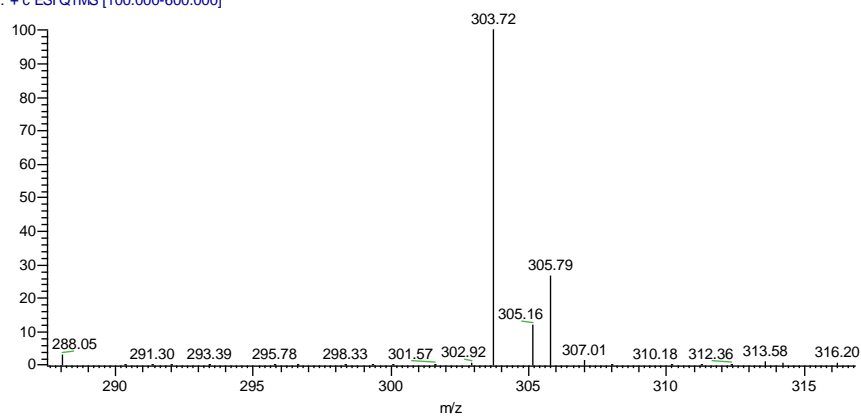

Figure S77. ESI-MS spectrum of (Z)-verbenone O-(2'-chlorobenzoyl) oxime **4f**.

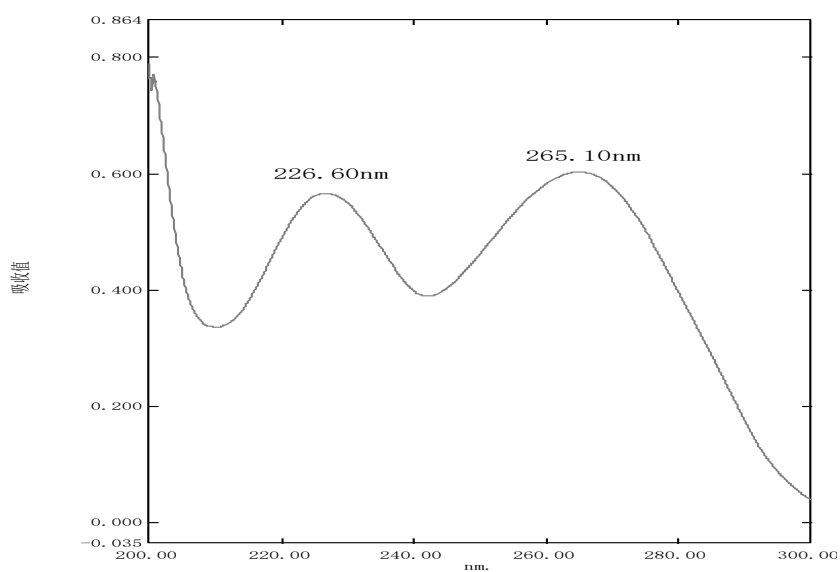

Figure S83. UV-vis spectrum of (Z)-verbenone O-(2'-fluorobenzoyl) oxime **4g** in EtOH.



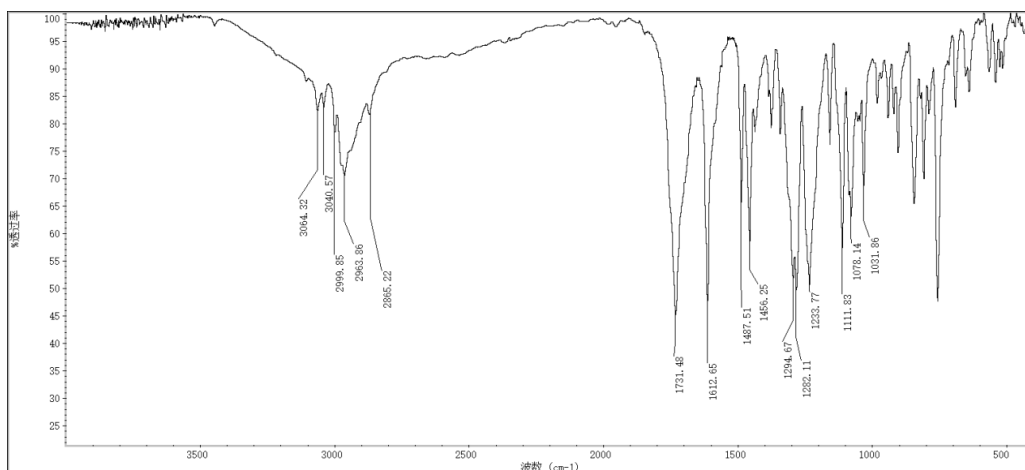

Figure S84. FTIR spectrum of (*Z*)-verbenone O-(2'-fluorobenzoyl) oxime **4g**.

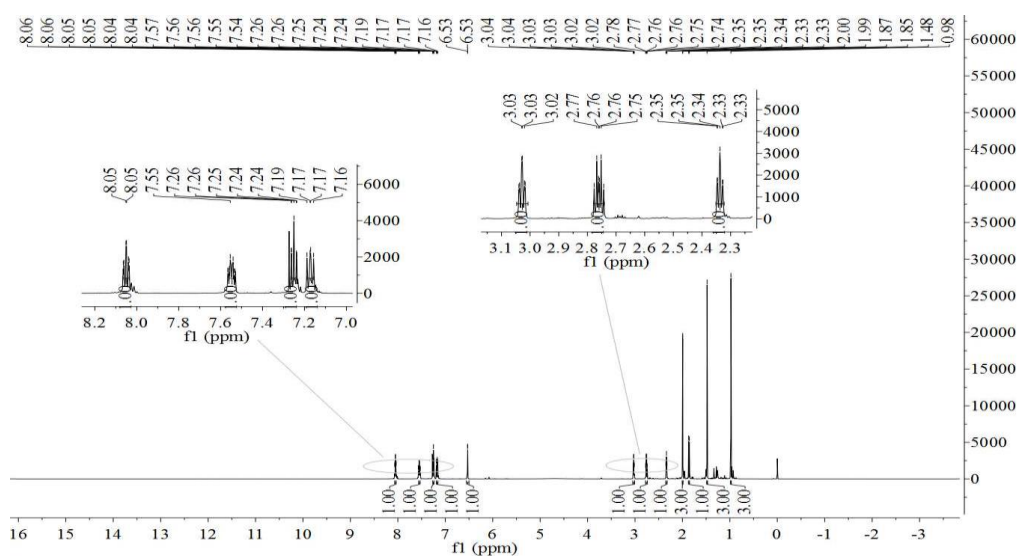

Figure S85.  $^1\text{H-NMR}$  spectrum of (*Z*)-verbenone O-(2'-fluorobenzoyl) oxime **4g** in  $\text{CDCl}_3$ .

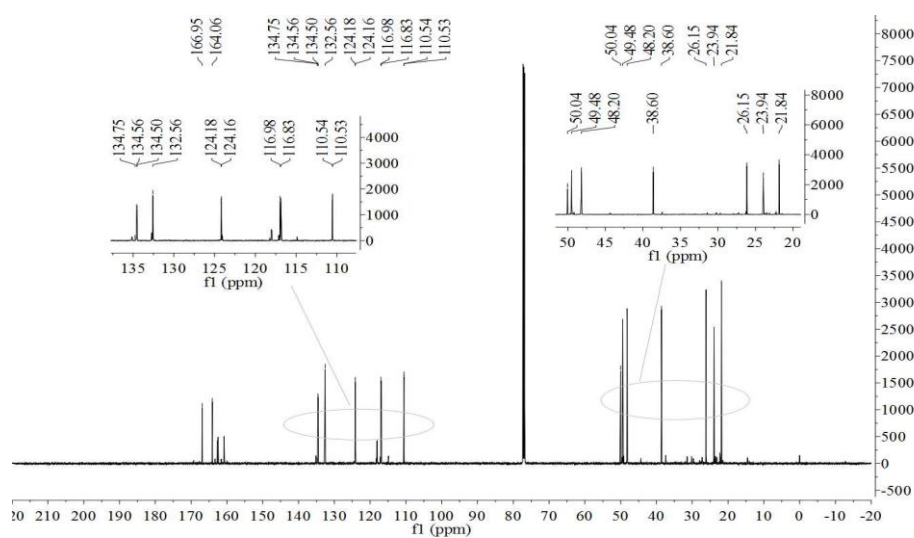

Figure S86.  $^{13}\text{C-NMR}$  spectrum of (*Z*)-verbenone O-(2'-fluorobenzoyl) oxime **4g** in  $\text{CDCl}_3$ .

HQ-LF1 #25 RT: 0.42 AV: 1 SB: 13 0.03-0.2  
T: + c ESI Q1 MS [100.000-600.000]

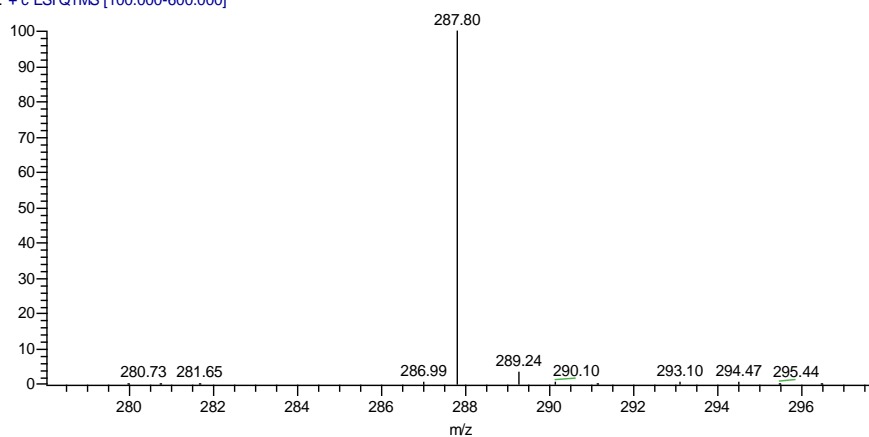

Figure S87. ESI-MS spectrum of (*Z*)-verbenone O-(2'-fluorobenzoyl) oxime **4g**.

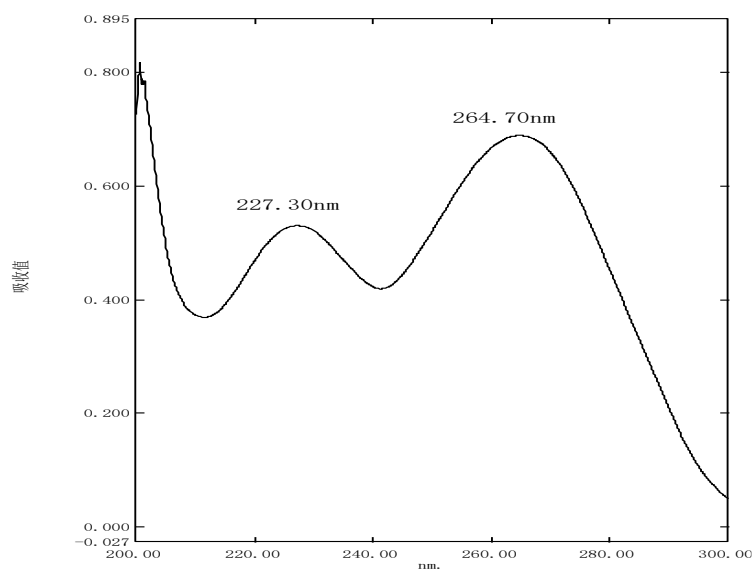

Figure S78. UV-vis spectrum of (*E*)-verbenone O-(2'-fluorobenzoyl) oxime **4g** in EtOH.

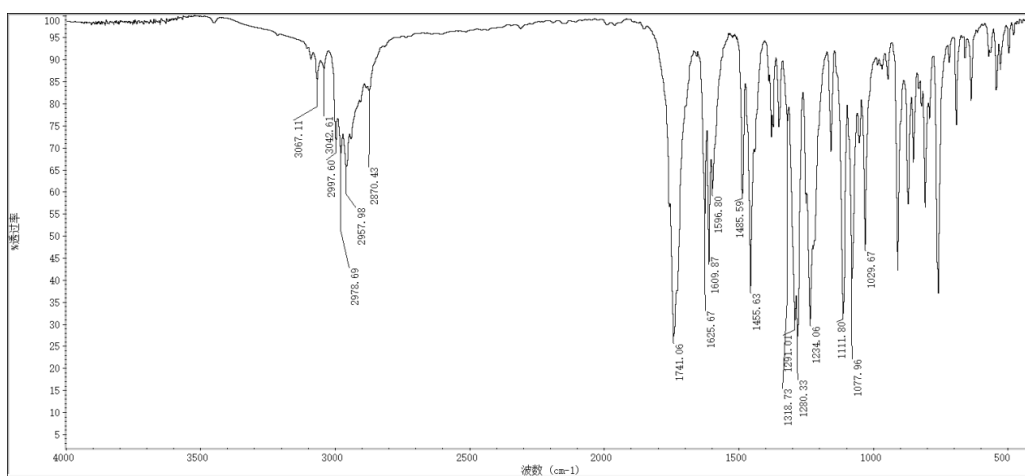

Figure S79. FTIR spectrum of (*E*)-verbenone O-(2'-fluorobenzoyl) oxime **4g**.

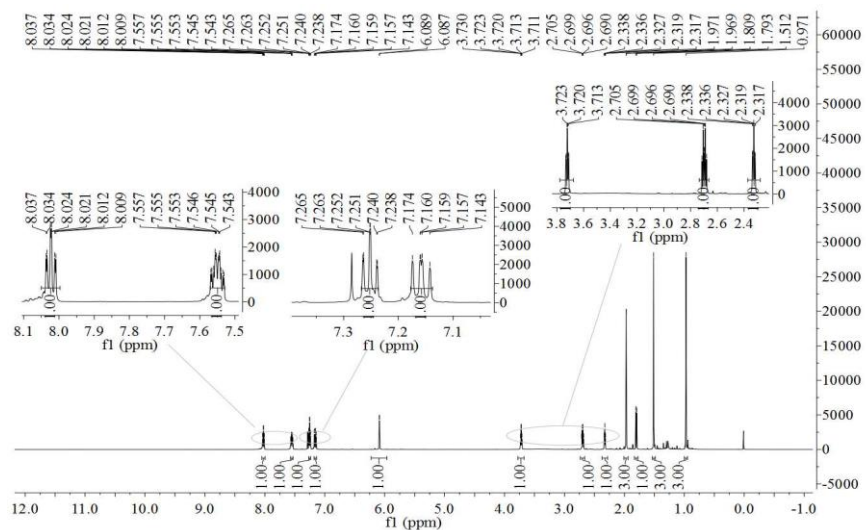

Figure S80.  $^1\text{H-NMR}$  spectrum of (*E*)-verbenone O-(2'-fluorobenzoyl) oxime **4g** in  $\text{CDCl}_3$ .

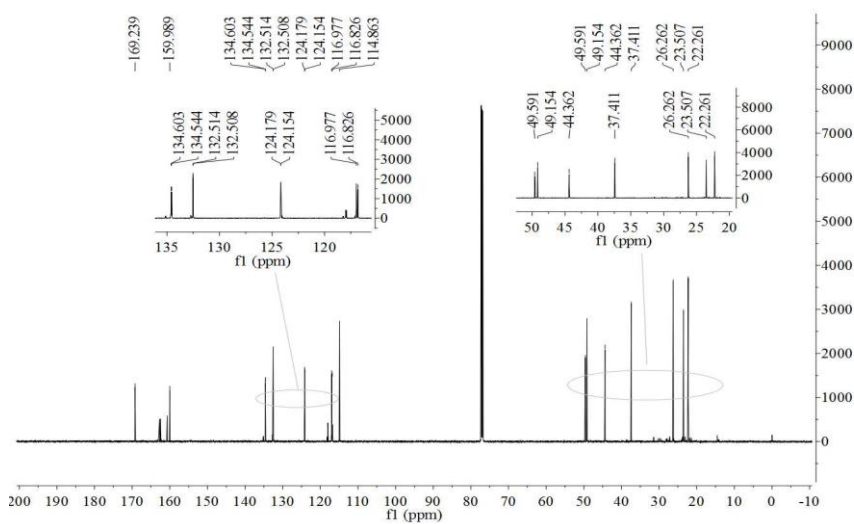

Figure S81.  $^{13}\text{C-NMR}$  spectrum of (*E*)-verbenone O-(2'-fluorobenzoyl) oxime **4g** in  $\text{CDCl}_3$ .

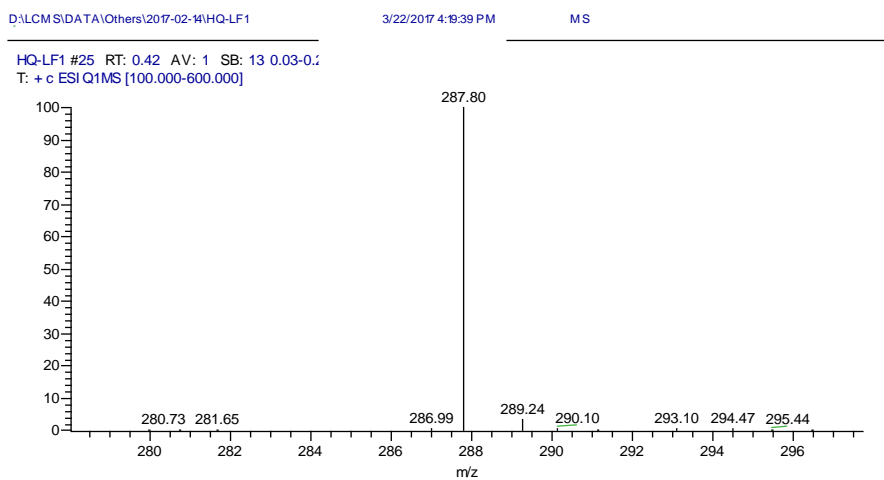

Figure S82. ESI-MS spectrum of (*E*)-verbenone O-(2'-fluorobenzoyl) oxime **4g**.

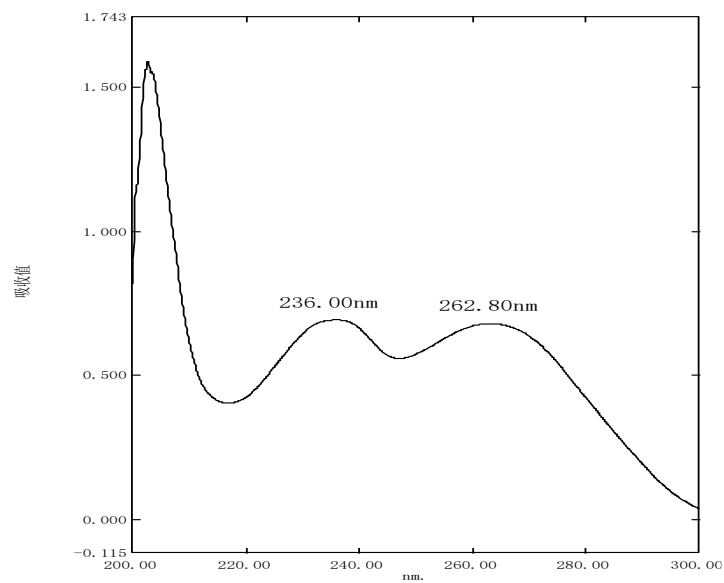

Figure S93. UV-vis spectrum of (Z)-verbenone O-(2'-methylbenzoyl) oxime **4h** in EtOH.

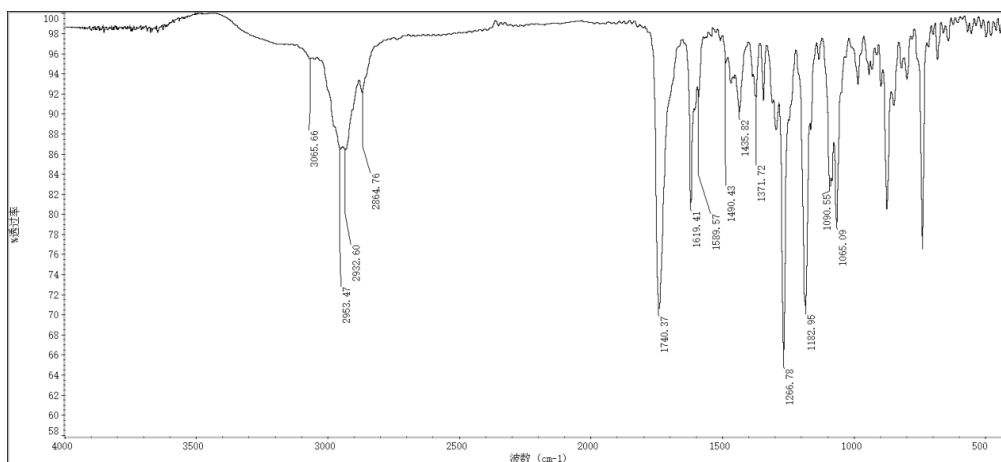

Figure S94. FTIR spectrum of (Z)-verbenone O-(3'-methylbenzoyl) oxime **4h**.

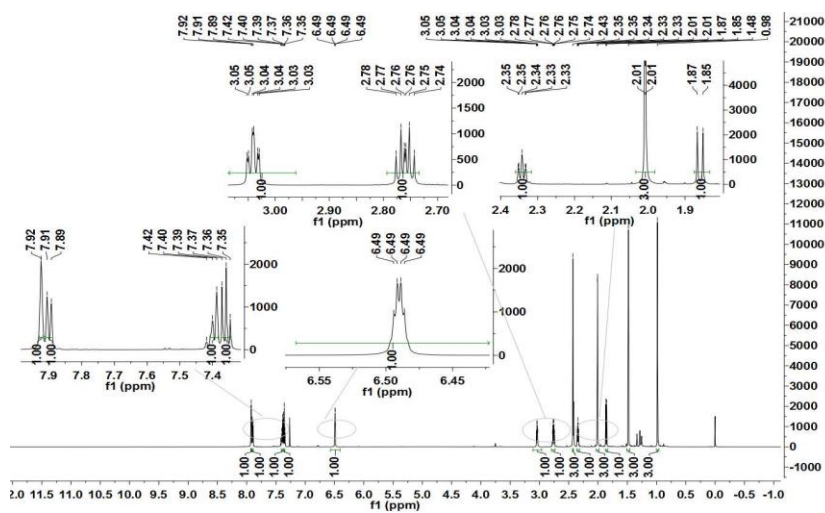

Figure S95. <sup>1</sup>H-NMR spectrum of (Z)-verbenone O-(3'-methylbenzoyl) oxime **4h** in CDCl<sub>3</sub>.

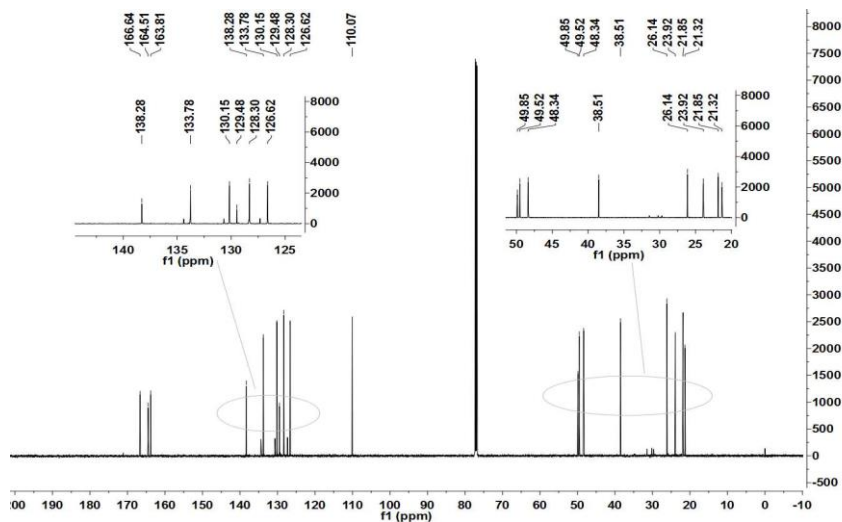

Figure S96.  $^{13}\text{C}$ -NMR spectrum of (Z)-verbenone O-(3'-methylbenzoyl) oxime **4h** in  $\text{CDCl}_3$ .

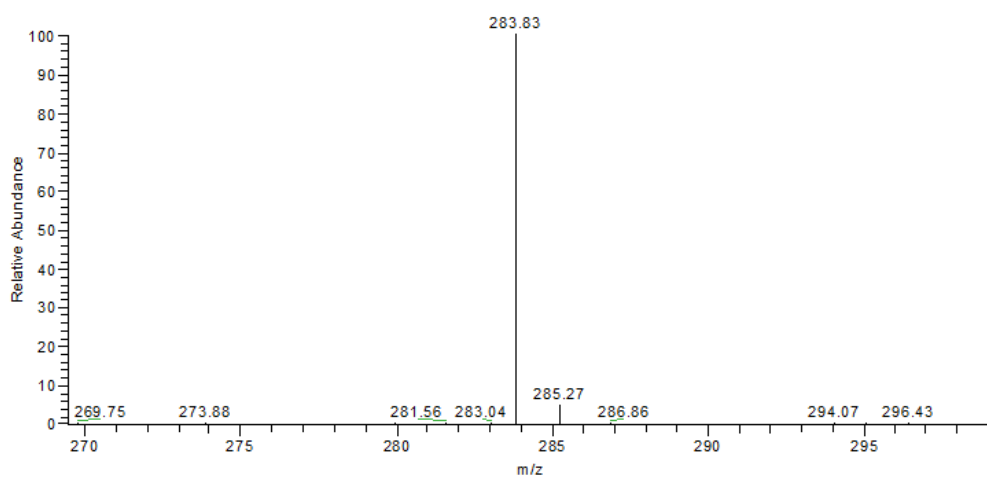

Figure S97. ESI-MS spectrum of (Z)-verbenone O-(3'-methylbenzoyl) oxime **4h**.

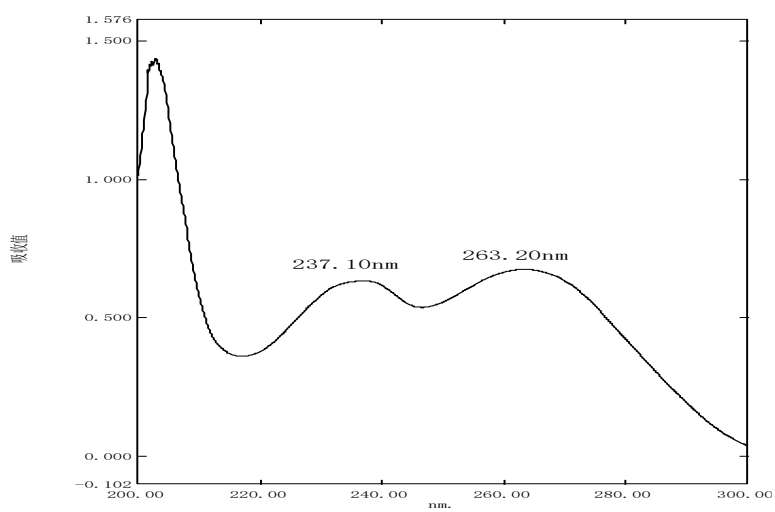

Figure S88. UV-vis spectrum of (E)-verbenone O-(3'-methylbenzoyl) oxime **4h** in  $\text{EtOH}$ .

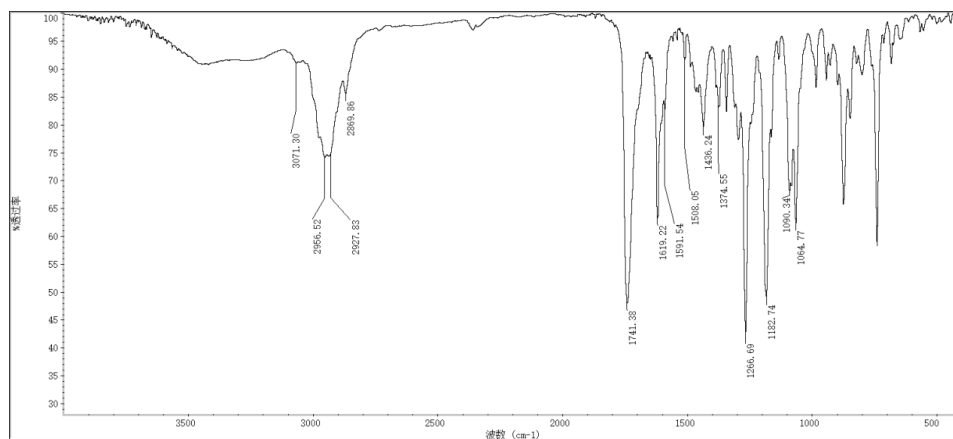

Figure S89. FTIR spectrum of (*E*)-verbenone O-(3'-methylbenzoyl) oxime **4h**.

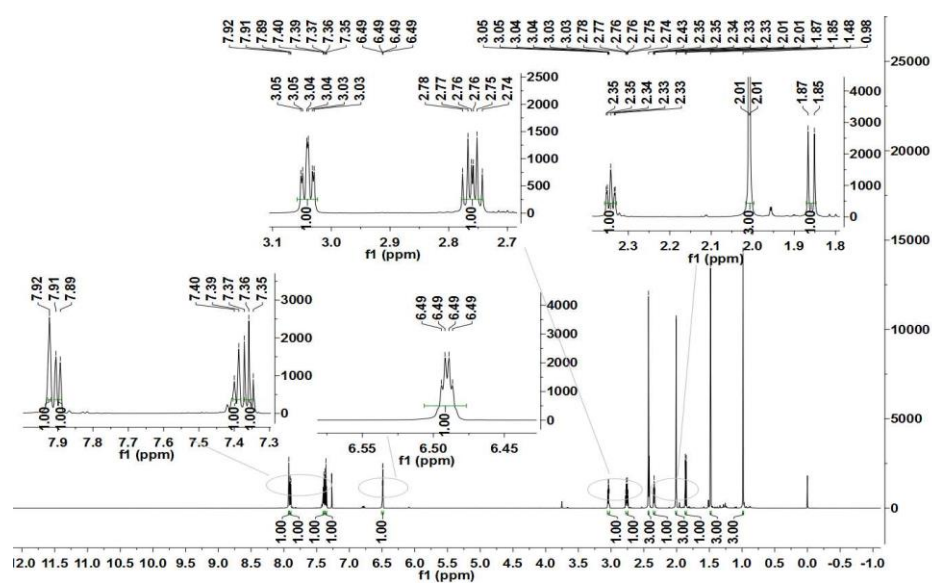

Figure S90. <sup>1</sup>H-NMR spectrum of (*E*)-verbenone O-(3'-methylbenzoyl) oxime **4h** in CDCl<sub>3</sub>.

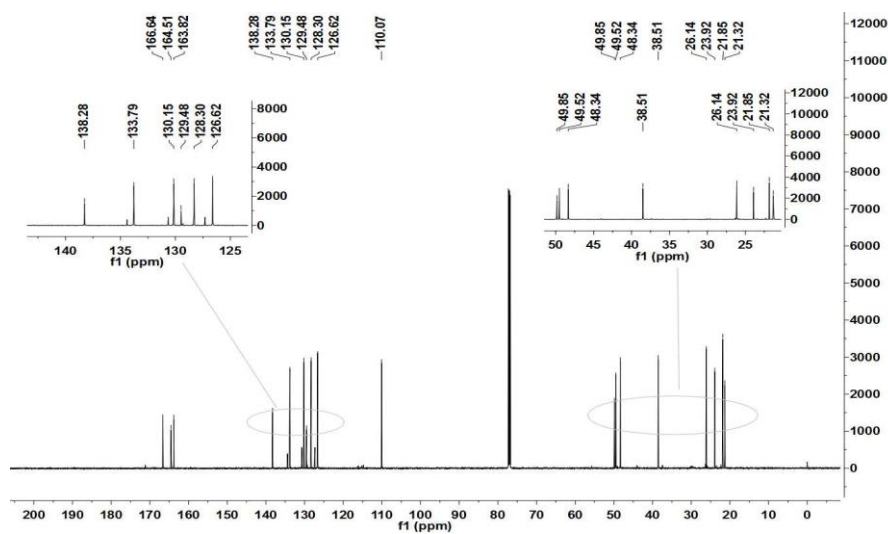

Figure S91. <sup>13</sup>C-NMR spectrum of (*E*)-verbenone O-(3'-methylbenzoyl) oxime **4h** in CDCl<sub>3</sub>.

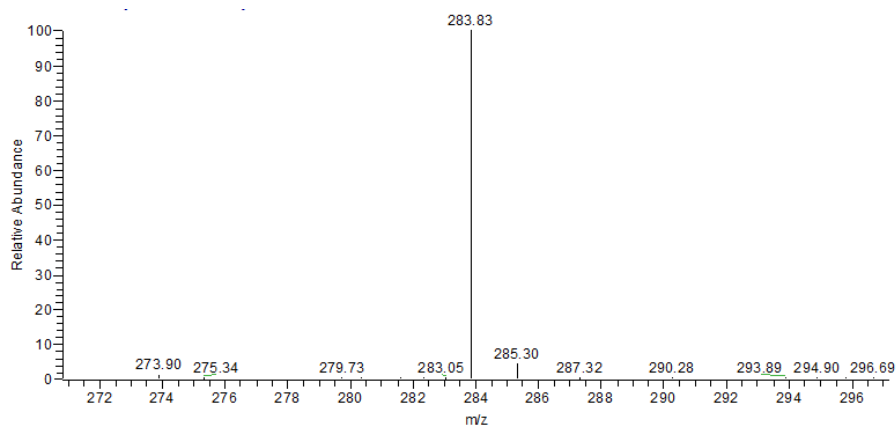

Figure S92. ESI-MS spectrum of (*E*)-verbenone O-(3'-methylbenzoyl) oxime **4h**.

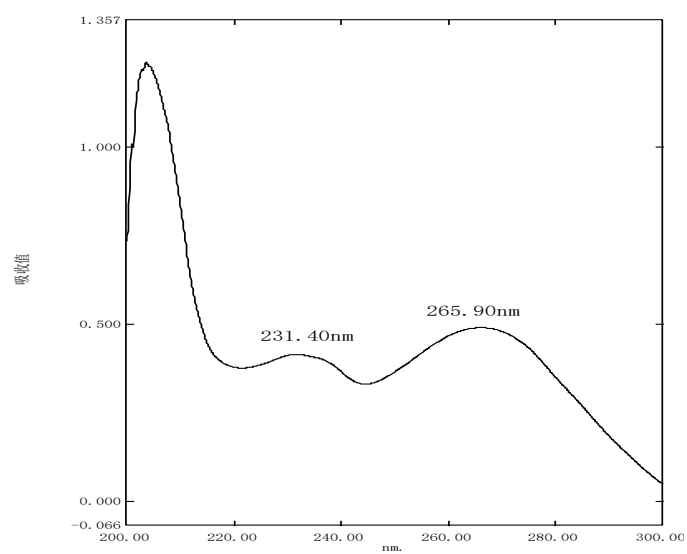

Figure S103. UV-vis spectrum of (*Z*)-verbenone O-(3'-chlorobenzoyl) oxime **4i** in EtOH.

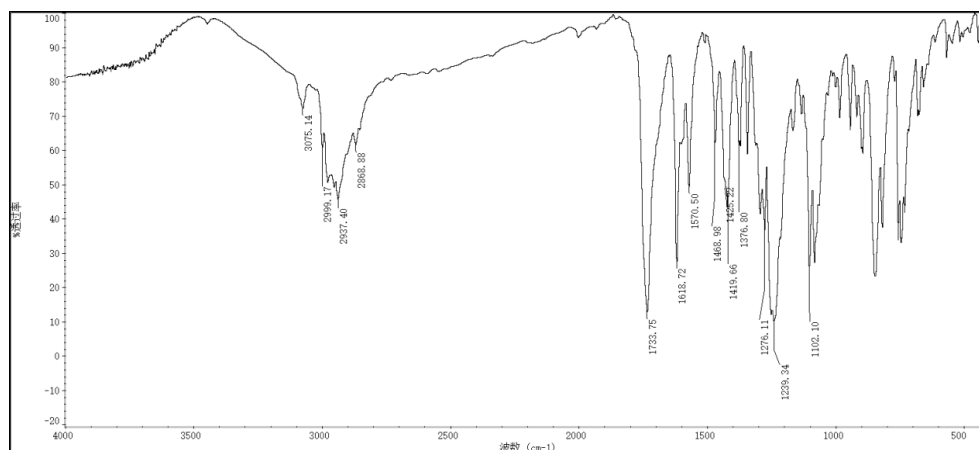

Figure S104. FTIR spectrum of (*Z*)-verbenone O-(3'- chlorobenzoyl) oxime **4i**.

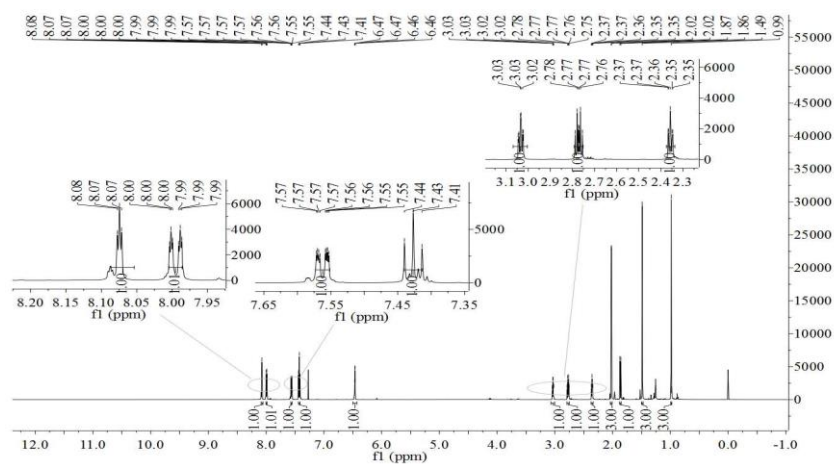

Figure S105.  $^1\text{H-NMR}$  spectrum of (Z)-verbenone O-(3'- chlorobenzoyl) oxime 4i in  $\text{CDCl}_3$ .

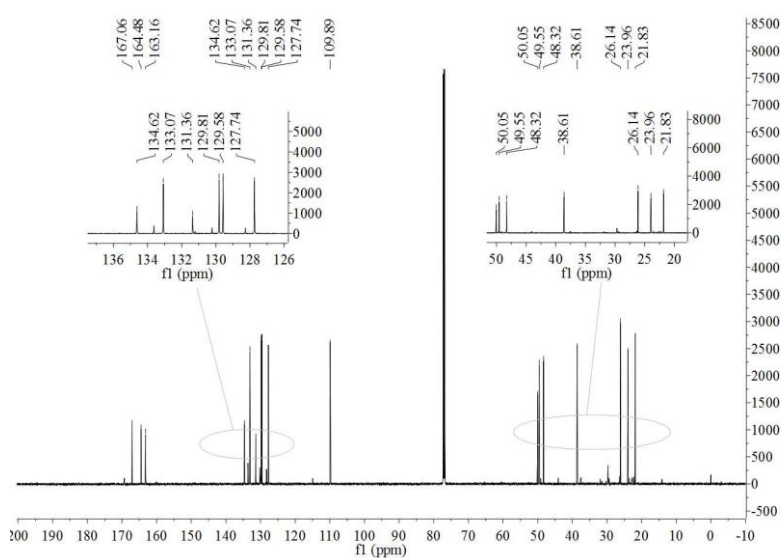

Figure S106.  $^{13}\text{C-NMR}$  spectrum of (Z)-verbenone O-(3'- chlorobenzoyl) oxime 4i in  $\text{CDCl}_3$ .

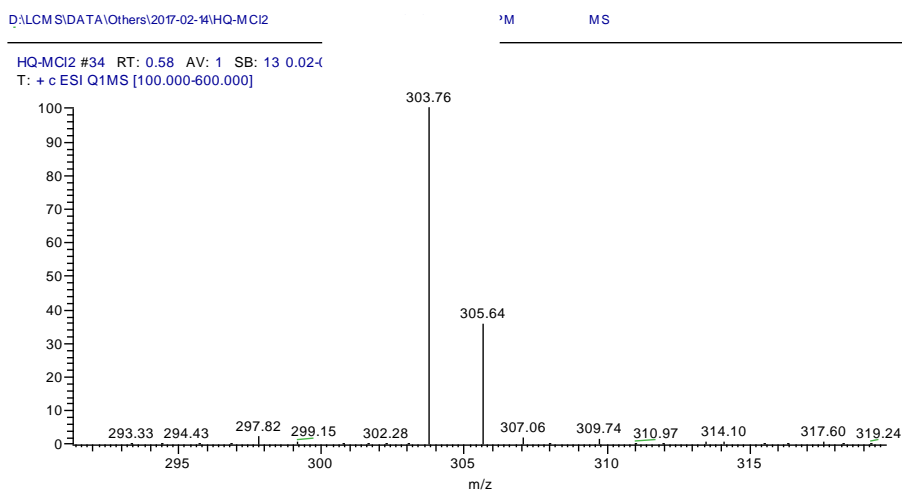

Figure S107. ESI-MS spectrum of (Z)-verbenone O-(3'- chlorobenzoyl) oxime 4i.





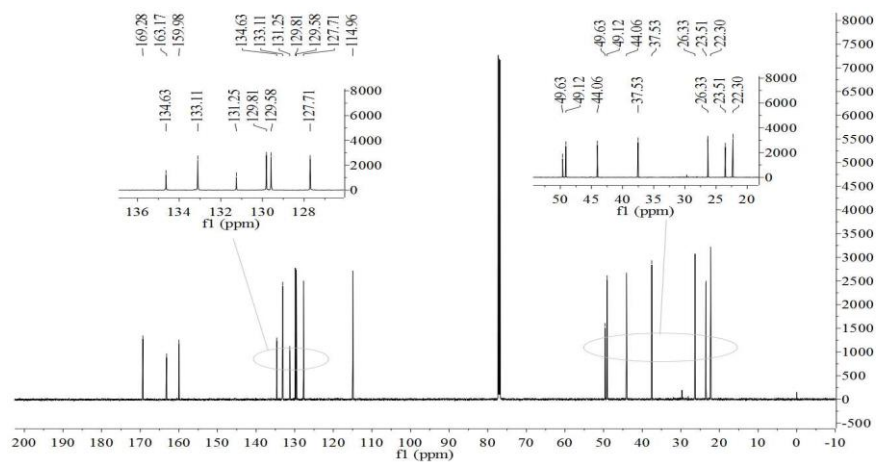

Figure S101. <sup>13</sup>C-NMR spectrum of (E)-verbenone O-(3'- chlorobenzoyl) oxime 4i in CDCl<sub>3</sub>.

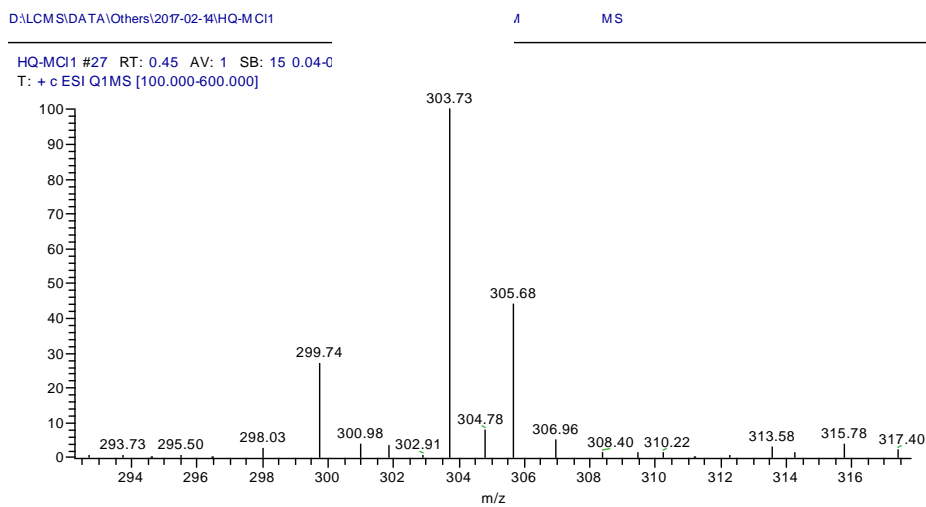

Figure S102. ESI-MS spectrum of (E)-verbenone O-(3'- chlorobenzoyl) oxime 4i.

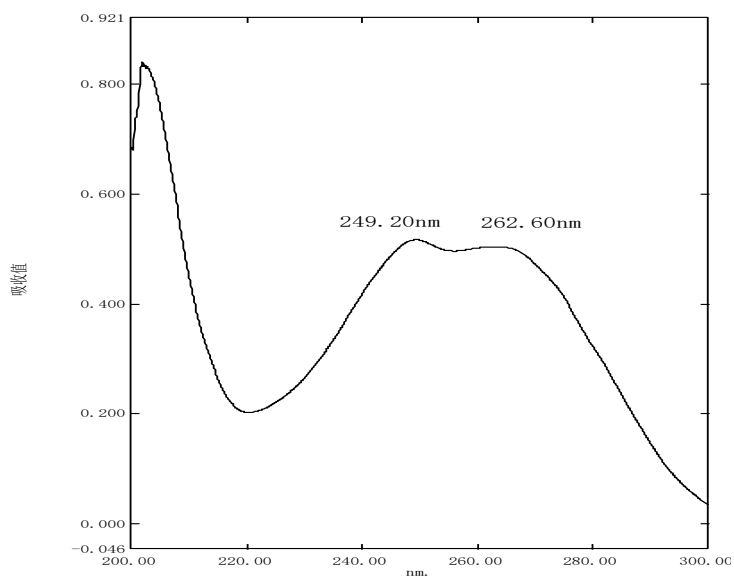

Figure S108. UV-vis spectrum of (Z)-verbenone O-(4'-bromobenzoyl) oxime 4j in EtOH.

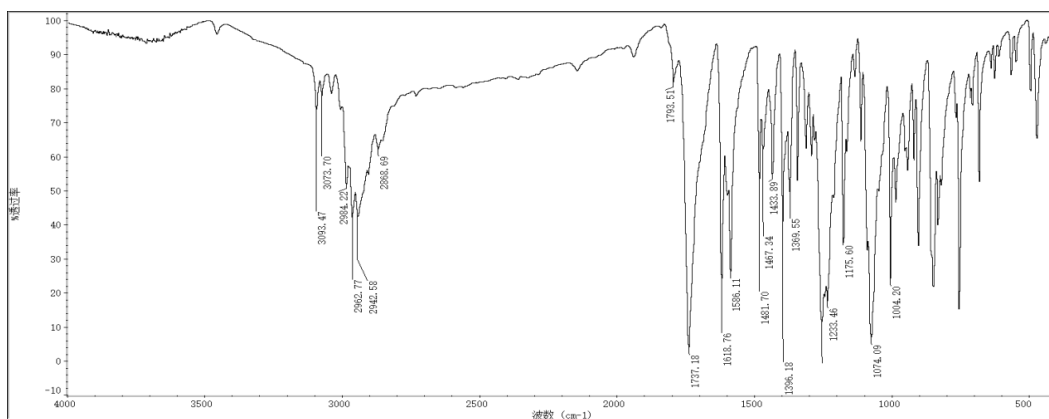

Figure S109. FTIR spectrum of (Z)-verbenone O-(4'-bromobenzoyl) oxime **4j**.

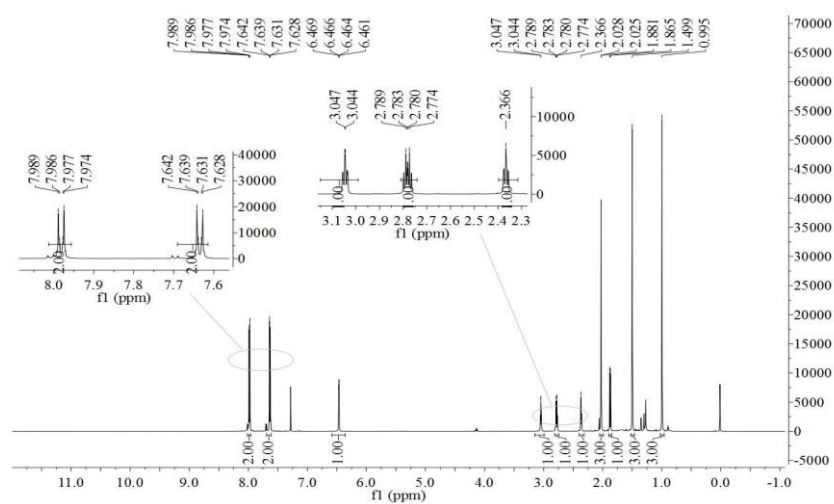

Figure S110. <sup>1</sup>H-NMR spectrum of (Z)-verbenone O-(4'-bromobenzoyl) oxime **4j** in CDCl<sub>3</sub>.

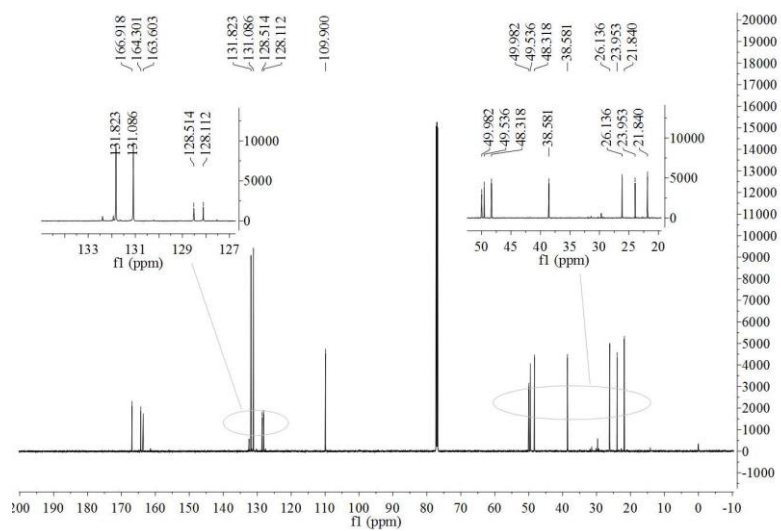

Figure S111. <sup>13</sup>C-NMR spectrum of (Z)-verbenone O-(4'-bromobenzoyl) oxime **4j** in CDCl<sub>3</sub>.

HQ-4Br2 #37 RT: 0.63 AV: 1 SB: 17 0.05-0.  
T: + c ESI Q1MS [100.000-600.000]

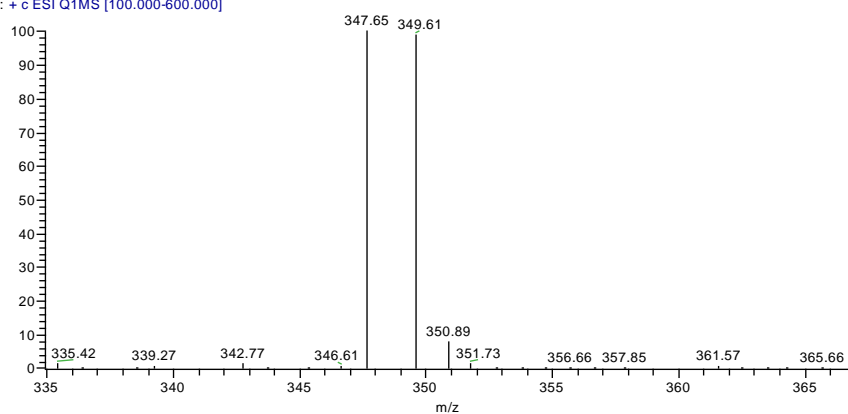

Figure S112. ESI-MS spectrum of (Z)-verbenone O-(4'-bromobenzoyl) oxime 4j.

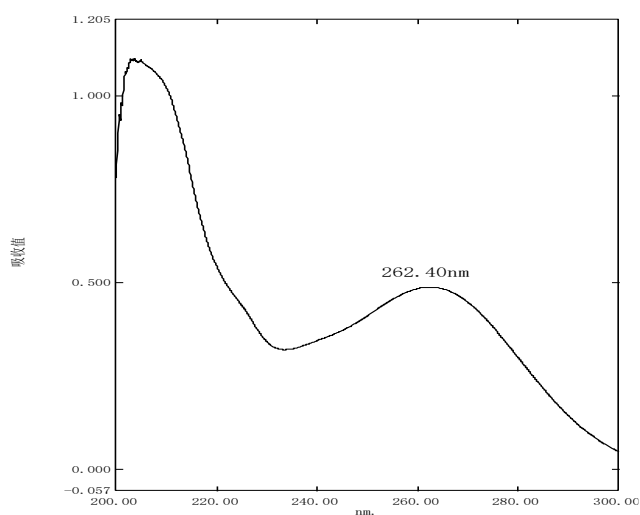

Figure S118. UV-vis spectrum of (Z)-verbenone O-(2', 3'-dichlorobenzoyl) oxime 4k in EtOH.

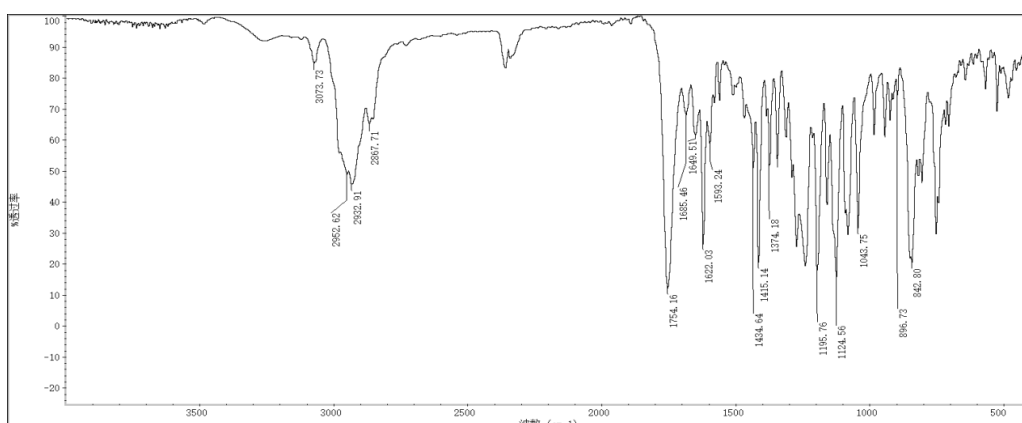

Figure S119. FTIR spectrum of (Z)-verbenone O-(2', 3'-dichlorobenzoyl) oxime 4k.

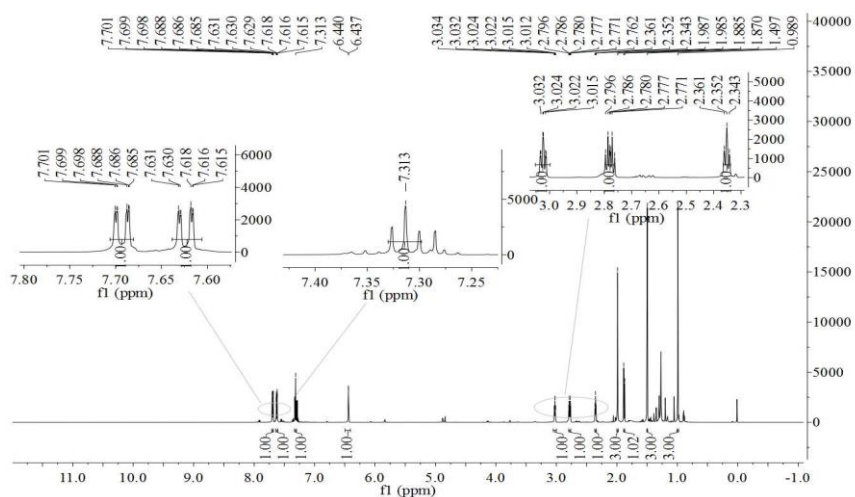

**Figure S120.**  $^1\text{H-NMR}$  spectrum of (*Z*)-verbenone O-(2', 3'-dichlorobenzoyl) oxime **4k** in  $\text{CDCl}_3$ .

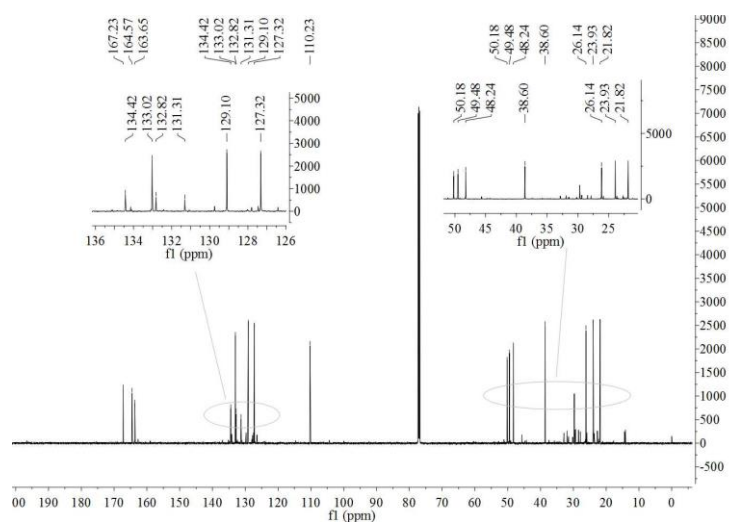

**Figure S121.**  $^{13}\text{C-NMR}$  spectrum of (*Z*)-verbenone O-(2', 3'-dichlorobenzoyl) oxime **4k** in  $\text{CDCl}_3$ .

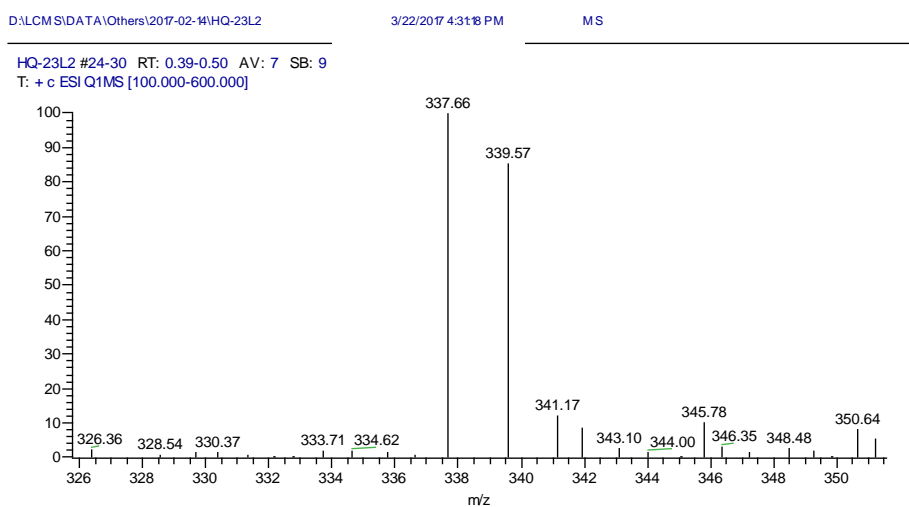

**Figure S122.** ESI-MS spectrum of (*Z*)-verbenone O-(2', 3'-dichlorobenzoyl) oxime **4k**.

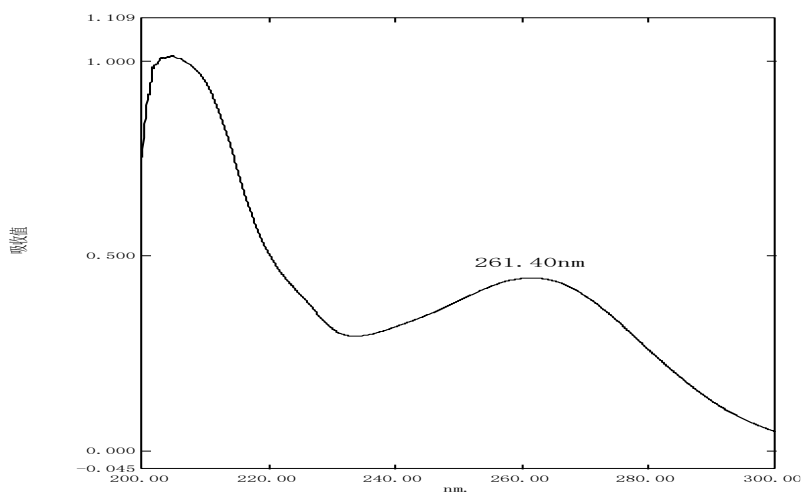

Figure S113. UV-vis spectrum of (*E*)-verbenone O-(2', 3'-dichlorobenzoyl) oxime **4k** in EtOH.

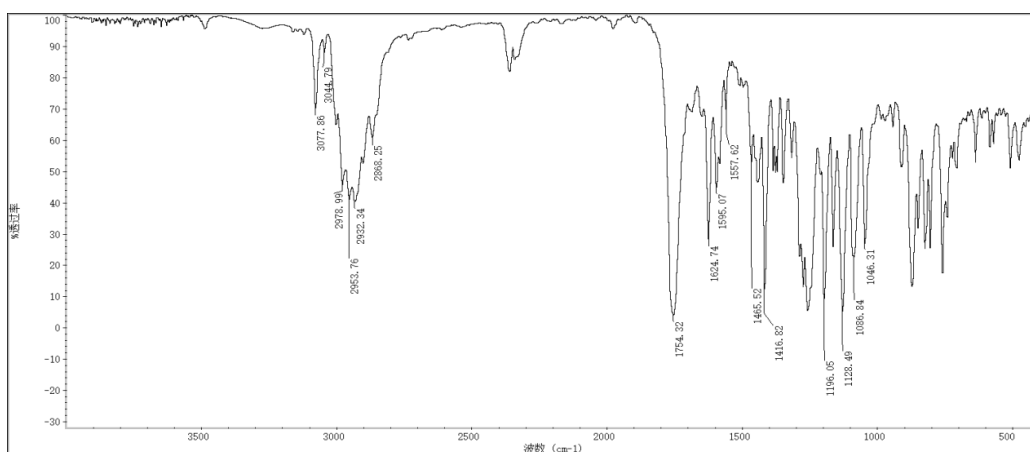

Figure S114. FTIR spectrum of (*E*)-verbenone O-(2', 3'-dichlorobenzoyl) oxime **4k**.

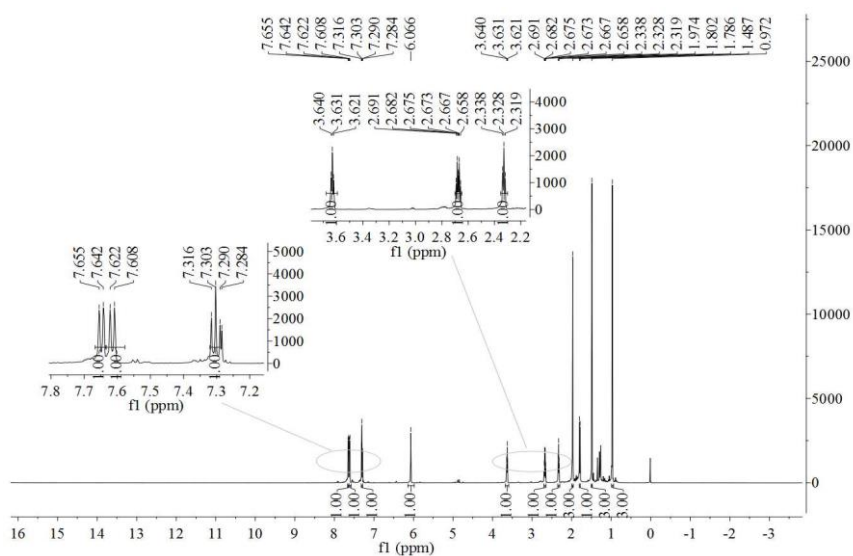

Figure S115. <sup>1</sup>H-NMR spectrum of (*E*)-verbenone O-(2', 3'-dichlorobenzoyl) oxime **4k** in CDCl<sub>3</sub>.

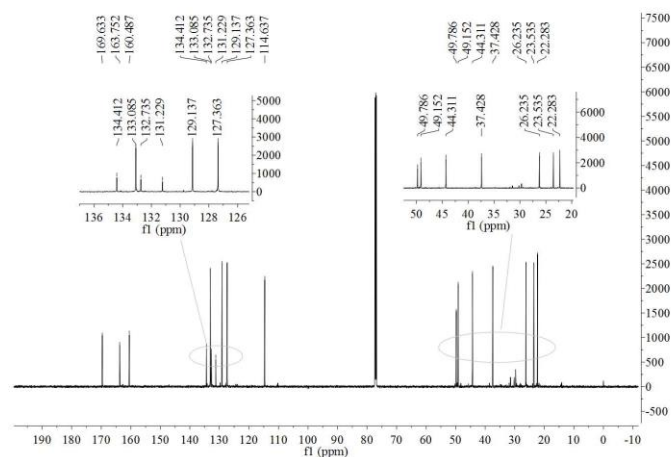

Figure S116.  $^{13}\text{C}$ -NMR spectrum of (*E*)-verbenone O-(2', 3'-dichlorobenzoyl) oxime **4k** in  $\text{CDCl}_3$ .

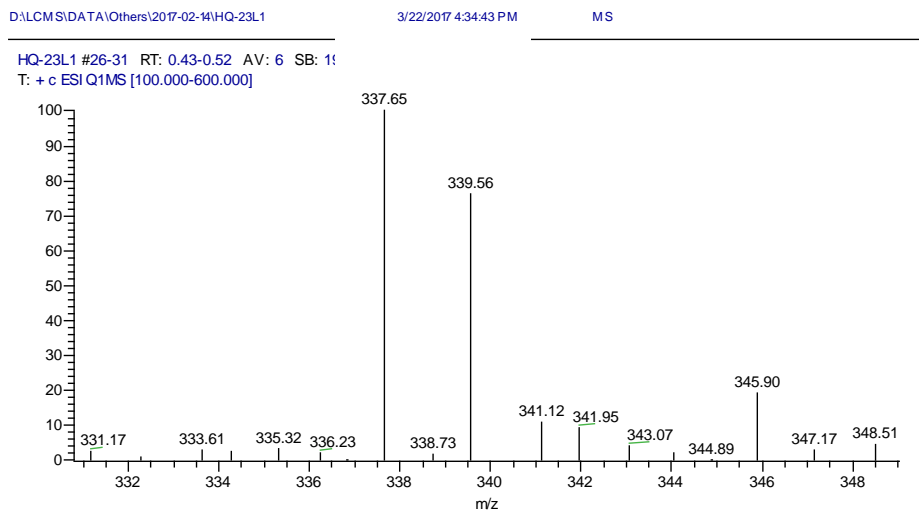

Figure S117. ESI-MS spectrum of (*E*)-verbenone O-(2', 3'-dichlorobenzoyl) oxime **4k**.

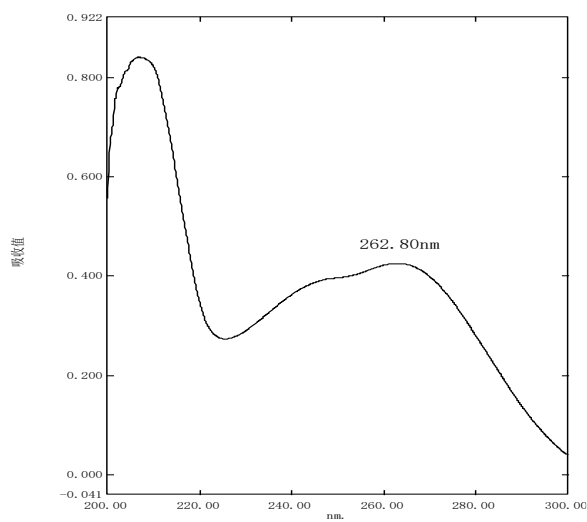

Figure S128. UV-vis spectrum of (*Z*)-verbenone O-(2', 4'-dichlorobenzoyl) oxime **4l** in  $\text{EtOH}$ .

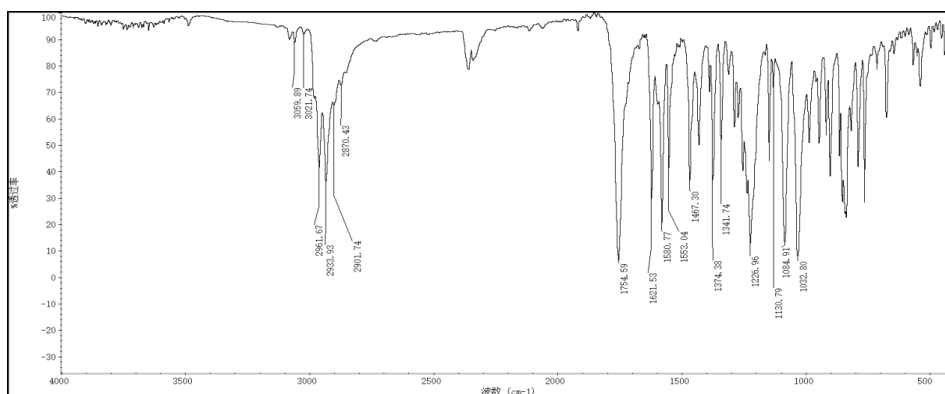

Figure S129. FTIR spectrum of (Z)-verbenone O-(2', 4'-dichlorobenzoyl) oxime **4l**.

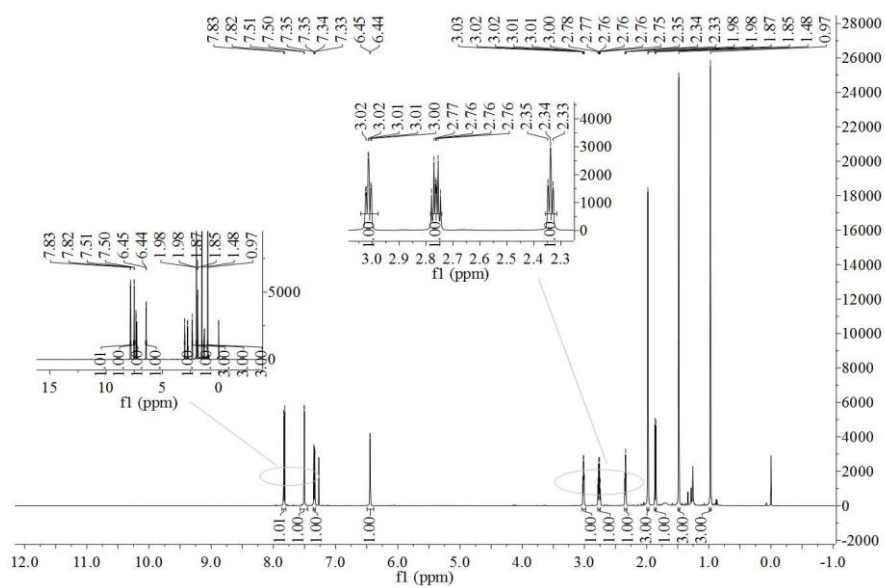

Figure S130. <sup>1</sup>H-NMR spectrum of (Z)-verbenone O-(2', 4'-dichlorobenzoyl) oxime **4l** in CDCl<sub>3</sub>.

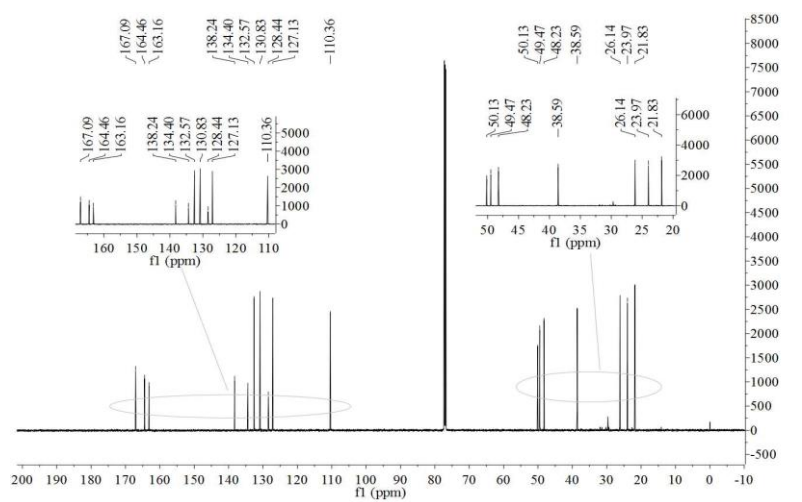

Figure S131. <sup>13</sup>C-NMR spectrum of (Z)-verbenone O-(2', 4'-dichlorobenzoyl) oxime **4l** in CDCl<sub>3</sub>.



HQ-24L2 #43 RT: 0.73 AV: 1 SB: 22 0.06-0  
T: + c ESI Q1MS [100.000-600.000]

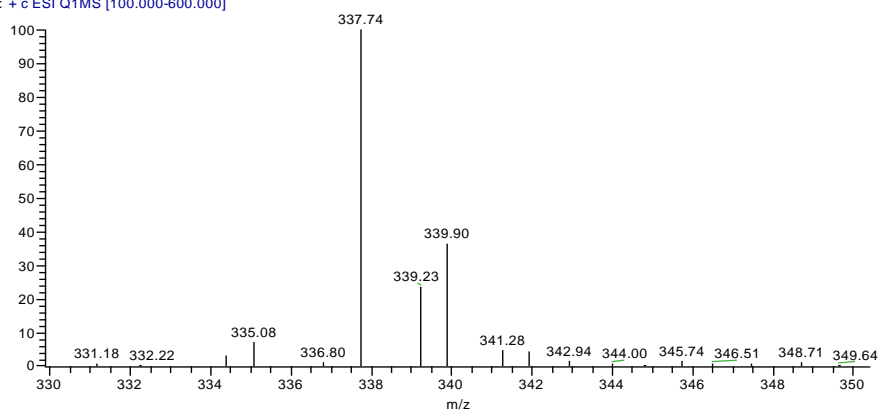

Figure S132. ESI-MS spectrum of (*Z*)-verbenone O-(2', 4'-dichlorobenzoyl) oxime **4l**.

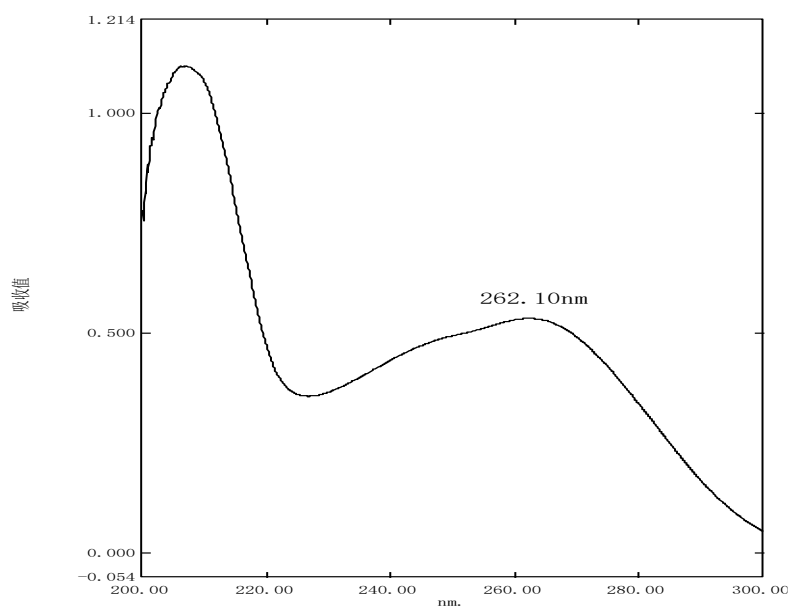

Figure S123. UV-vis spectrum of (*E*)-verbenone O-(2', 4'-dichlorobenzoyl) oxime **4l** in EtOH.

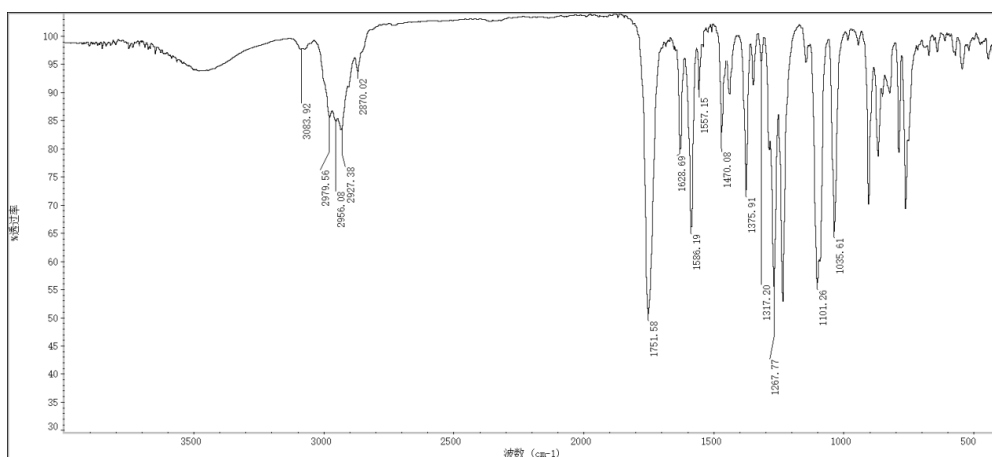

Figure S124. FTIR spectrum of (*E*)-verbenone O-(2', 4'-dichlorobenzoyl) oxime **4l**.

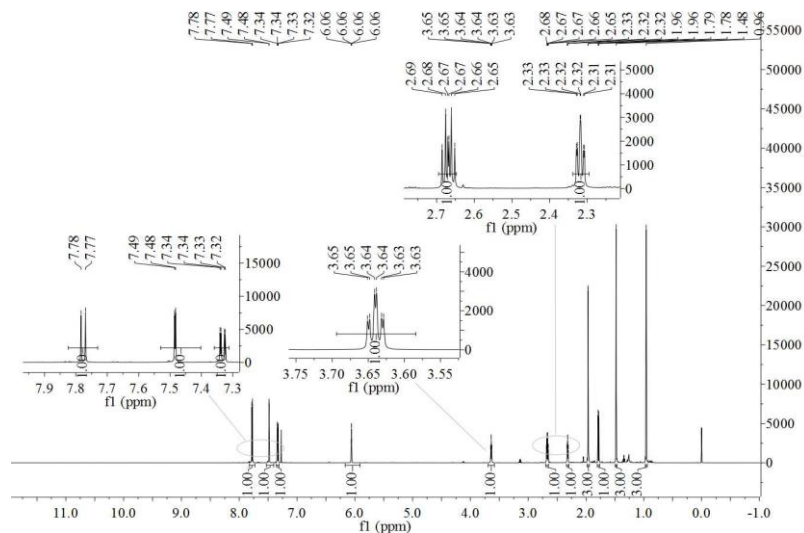

Figure S125. <sup>1</sup>H-NMR spectrum of (E)-verbenone O-(2', 4'-dichlorobenzoyl) oxime 4l in CDCl<sub>3</sub>.

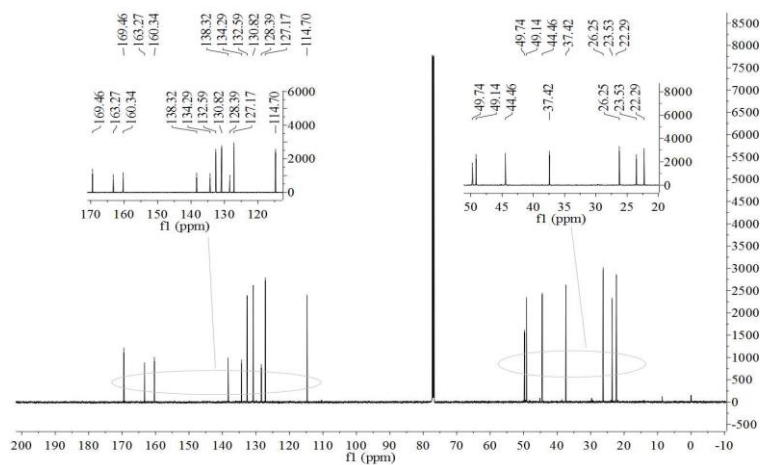

Figure S126. <sup>13</sup>C-NMR spectrum of (E)-verbenone O-(2', 4'-dichlorobenzoyl) oxime 4l in CDCl<sub>3</sub>.

D:\LCM\SDATA\Others\2017-02-14\HQ-24L1

3/22/2017 4:12:48 PM

MS

HQ-24L1 #41-45 RT: 0.69-0.76 AV: 5 SB: 8  
T: + c ESI Q1MS [100.000-600.000]

7.23E6

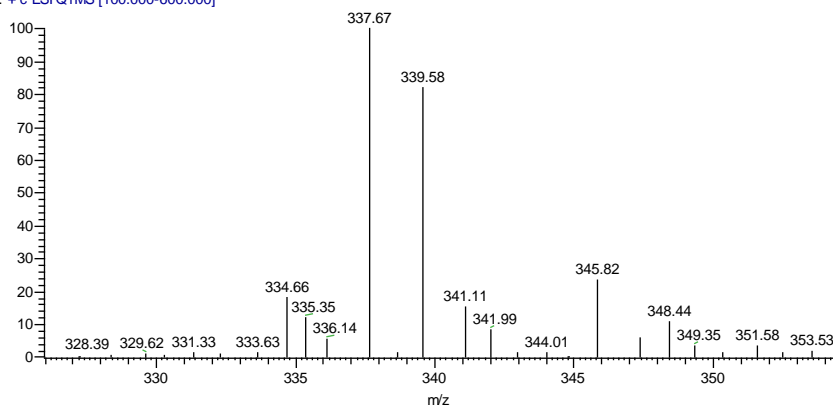

Figure S127. ESI-MS spectrum of (E)-verbenone O-(2', 4'-dichlorobenzoyl) oxime 4l.

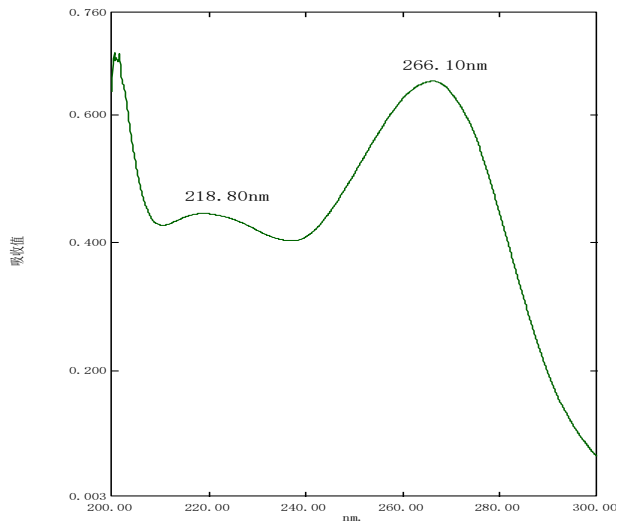

Figure S138. UV-vis spectrum of (Z)-verbenone O-2-chloropyridylcarbonyl oxime **4m** in EtOH.

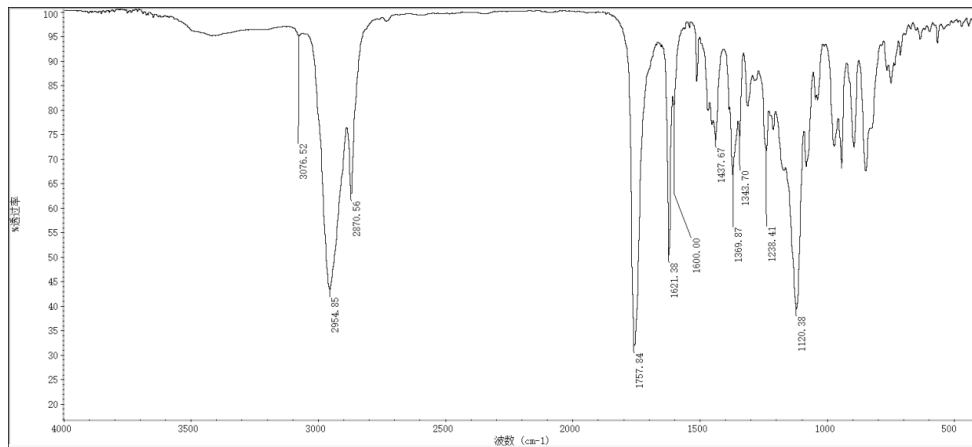

Figure S139. FTIR spectrum of (Z)-verbenone O-2-chloropyridylcarbonyl oxime **4m**.

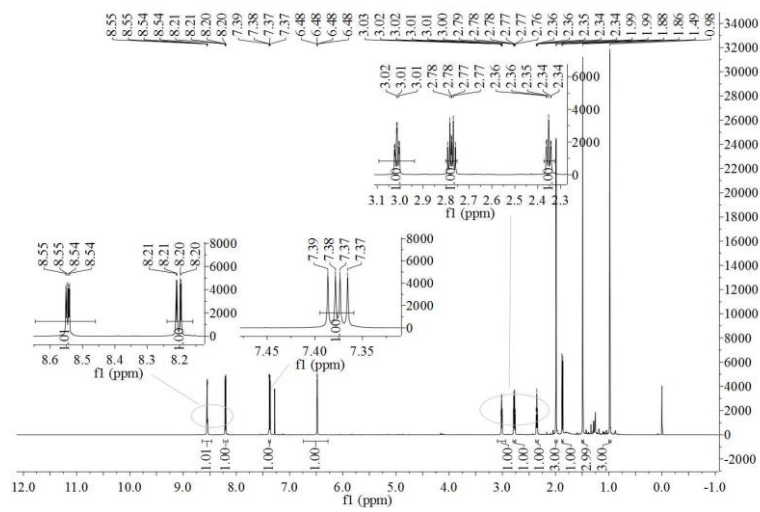

Figure S140.  $^1\text{H-NMR}$  spectrum of (Z)-verbenone O-2-chloropyridylcarbonyl oxime **4m** in  $\text{CDCl}_3$ .

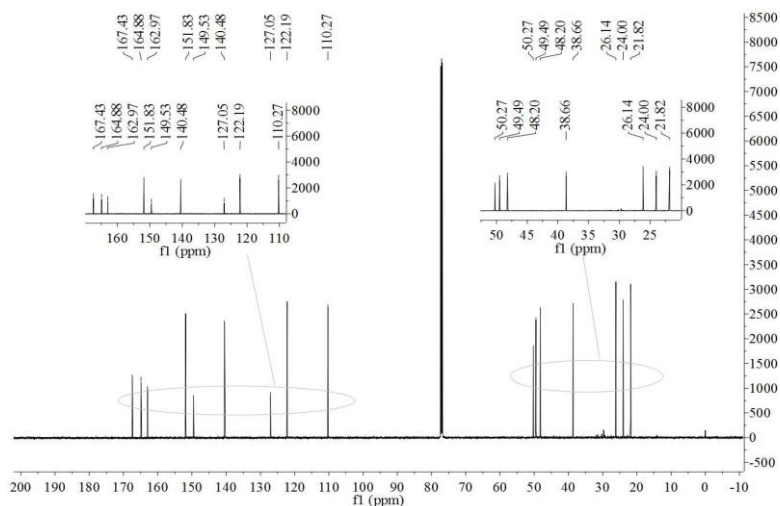

Figure S141.  $^{13}\text{C}$ -NMR spectrum of (*Z*)-verbenone O-2-chloropyridylcarbonyl oxime **4m** in  $\text{CDCl}_3$ .

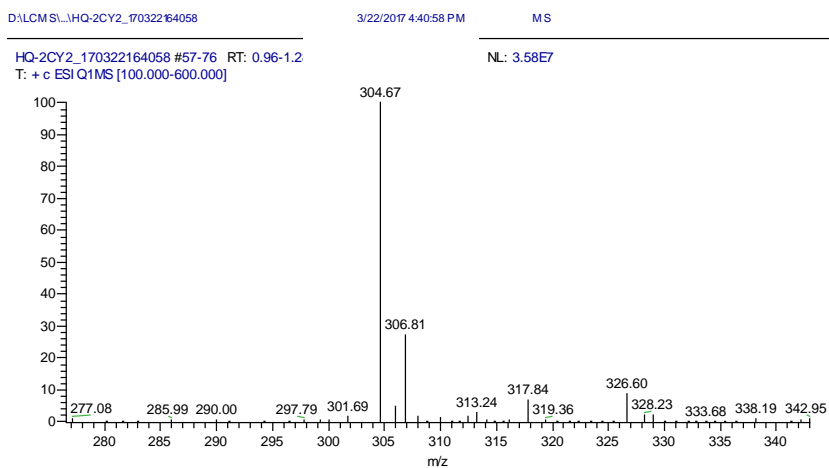

Figure S142. ESI-MS spectrum of (*Z*)-verbenone O-2-chloropyridylcarbonyl oxime **4m**

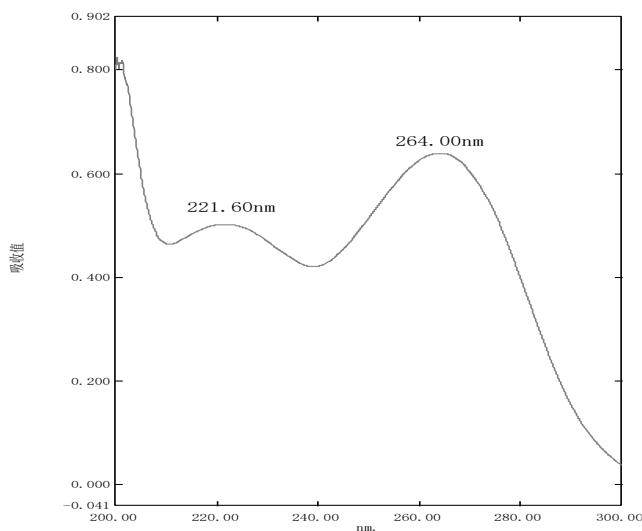

Figure S143. UV-vis spectrum of (*E*)-verbenone O-2-chloropyridylcarbonyl oxime **4m** in  $\text{EtOH}$ .

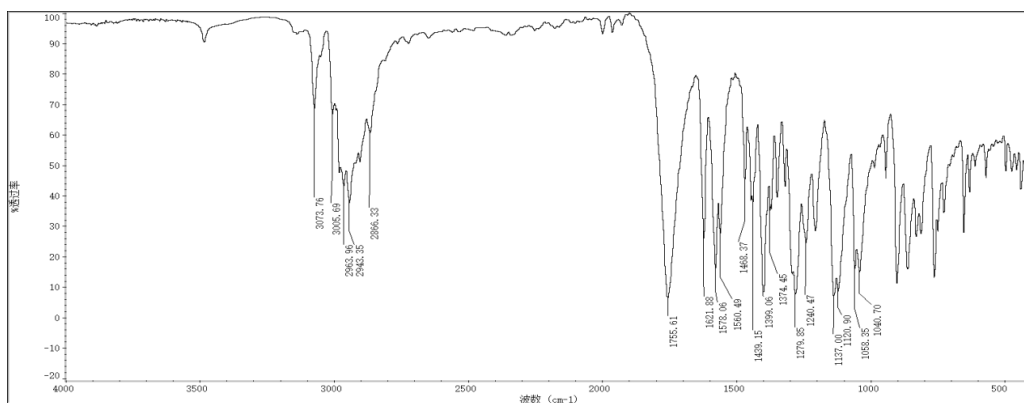

Figure S134. FTIR spectrum of (*E*)-verbenone O-2-chloropyridylcarbonyl oxime **4m**.

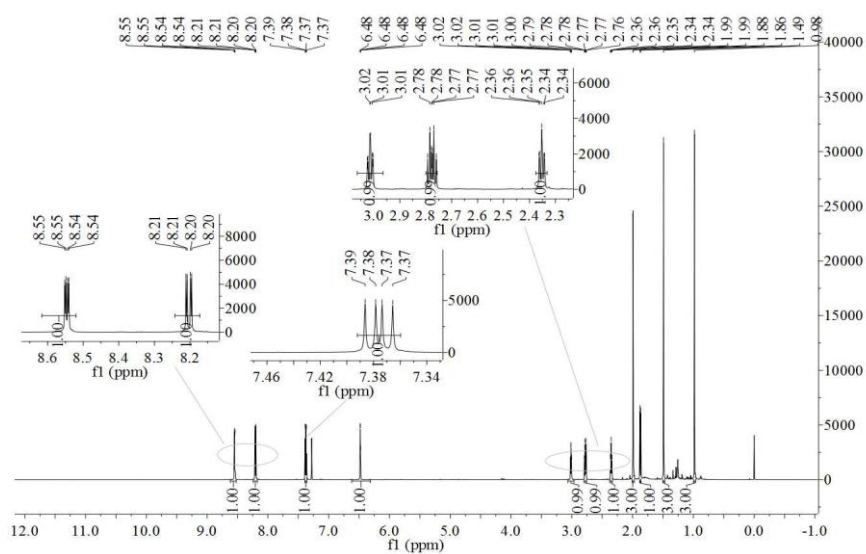

Figure S135. <sup>1</sup>H-NMR spectrum of (*E*)-verbenone O-2-chloropyridylcarbonyl oxime **4m** in CDCl<sub>3</sub>.

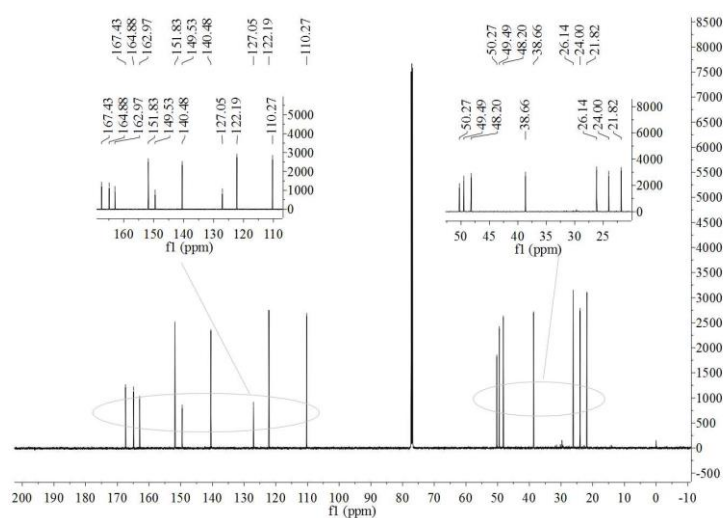

Figure S136. <sup>13</sup>C-NMR spectrum of (*E*)-verbenone O-2-chloropyridylcarbonyl oxime **4m** in CDCl<sub>3</sub>.

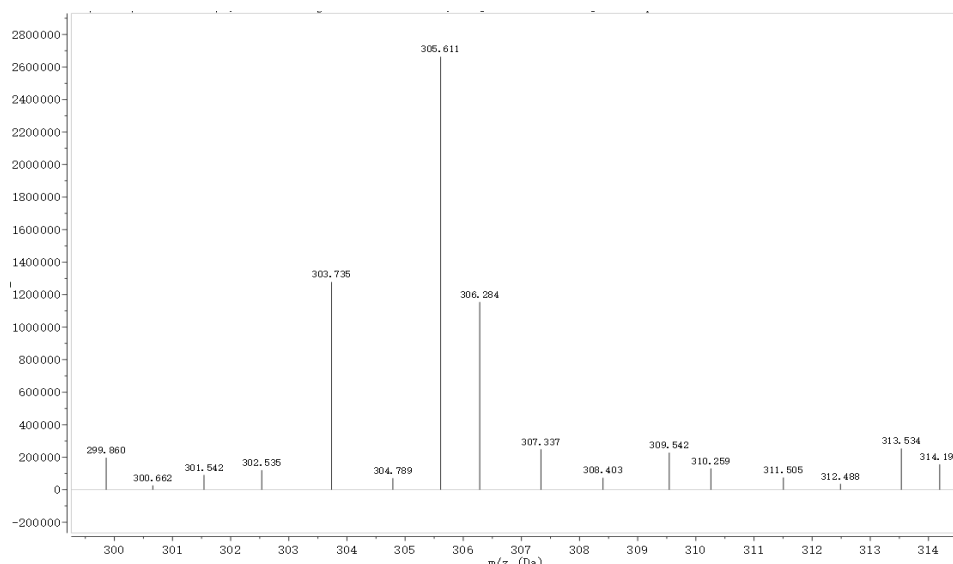

Figure S137. ESI-MS spectrum of (*E*)-verbenone O-2-chloropyridylcarbonyl oxime **4m**.

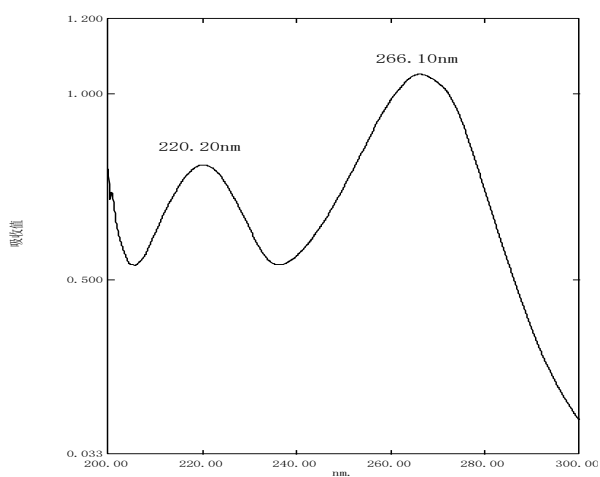

Figure S148. UV-vis spectrum of (*Z*)-verbenone O- $\beta$ -pyridylcarbonyl oxime **4n** in EtOH.

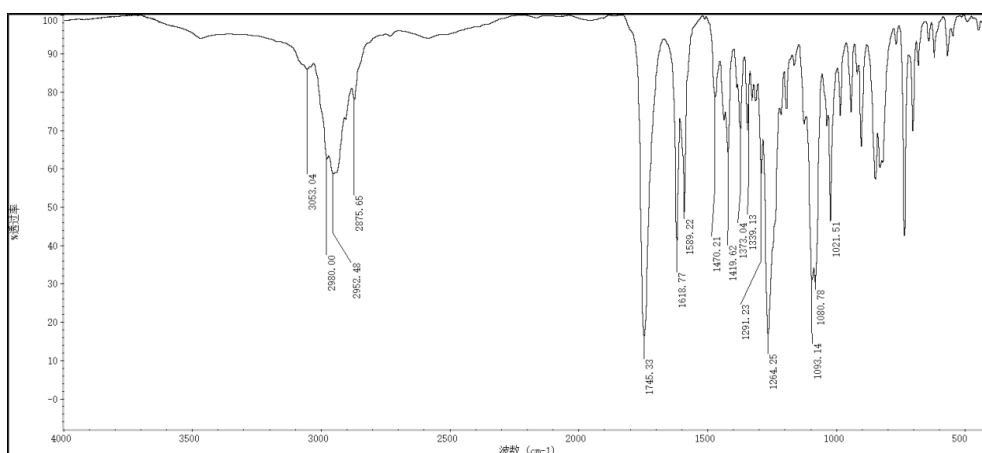

Figure S149. FTIR spectrum of (*Z*)-verbenone O- $\beta$ -pyridylcarbonyl oxime **4n**.

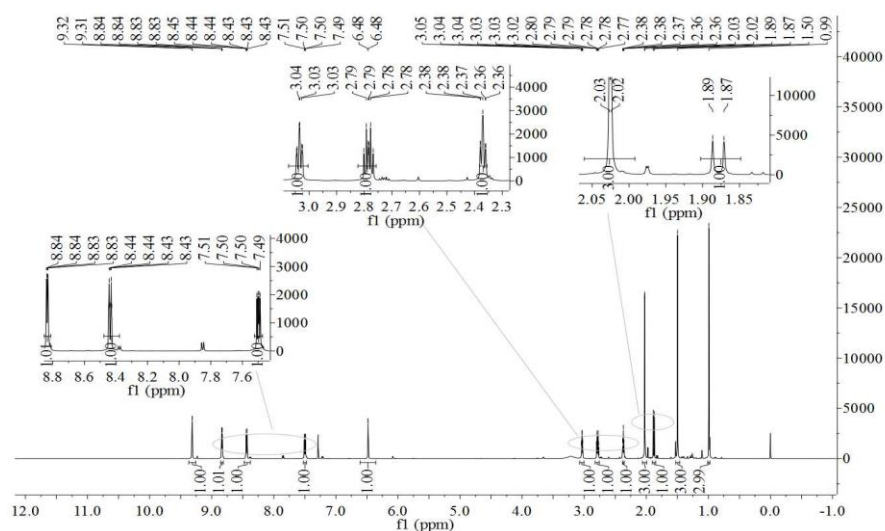

Figure S150.  $^1\text{H-NMR}$  spectrum of (*Z*)-verbenone *O*- $\beta$ -pyridylcarbonyl oxime **4n** in  $\text{CDCl}_3$ .

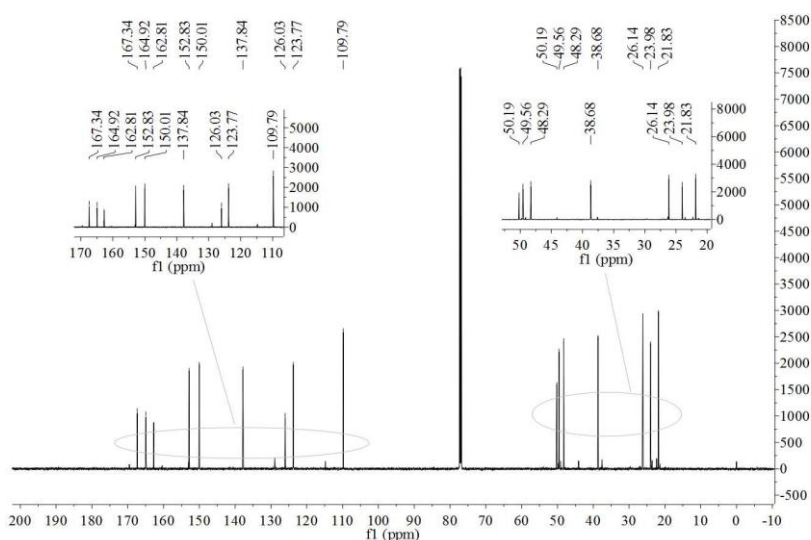

Figure S151.  $^{13}\text{C-NMR}$  spectrum of (*Z*)-verbenone *O*- $\beta$ -pyridylcarbonyl oxime **4n** in  $\text{CDCl}_3$ .

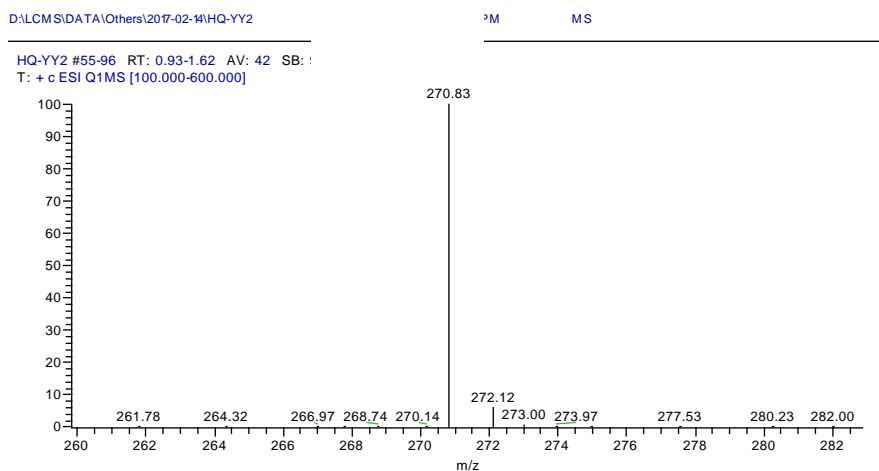

Figure S152. ESI-MS spectrum of (*Z*)-verbenone *O*- $\beta$ -pyridylcarbonyl oxime **4n**.

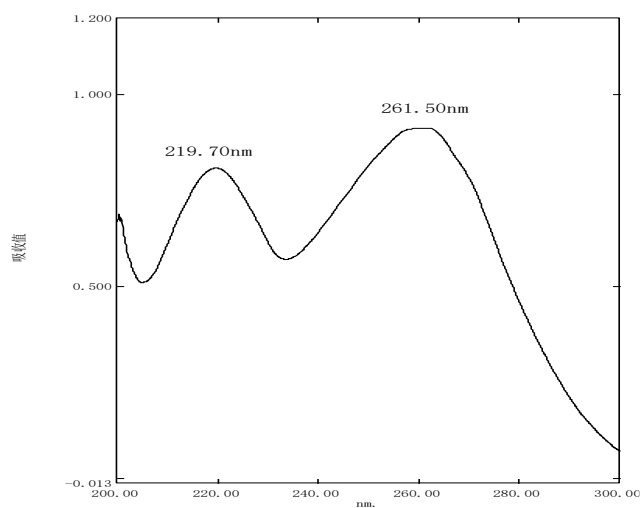

Figure S143. UV-vis spectrum of (*E*)-verbenone *O*- $\beta$ -pyridylcarbonyl oxime **4n** in EtOH.

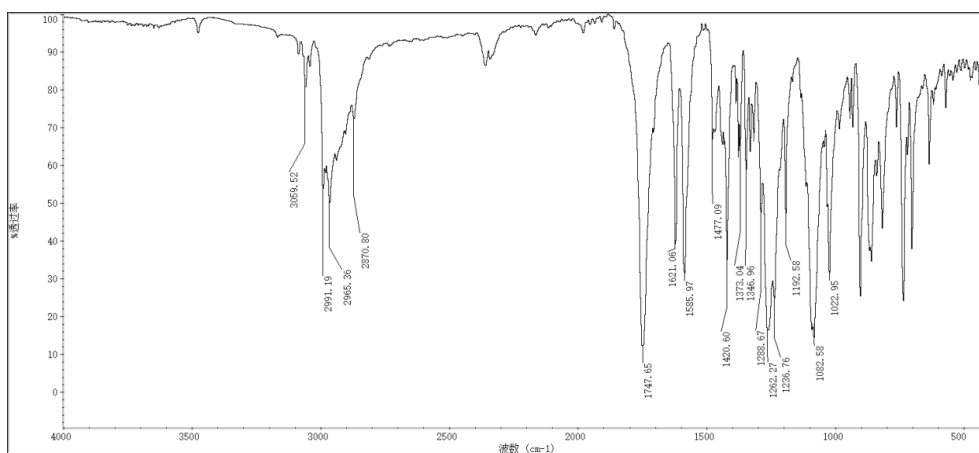

Figure S144. FTIR spectrum of (*E*)-verbenone *O*- $\beta$ -pyridylcarbonyl oxime **4n**.

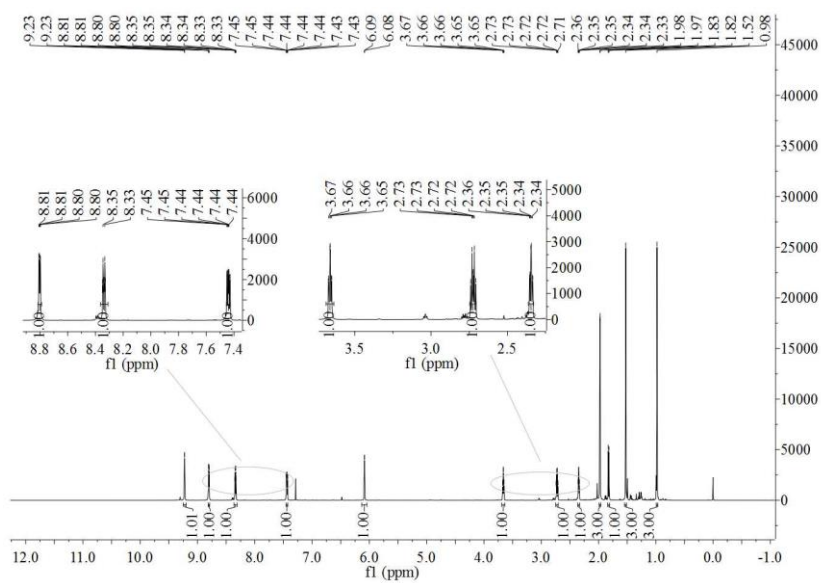

Figure S145.  $^1\text{H-NMR}$  spectrum of (*E*)-verbenone *O*- $\beta$ -pyridylcarbonyl oxime **4n** in  $\text{CDCl}_3$ .



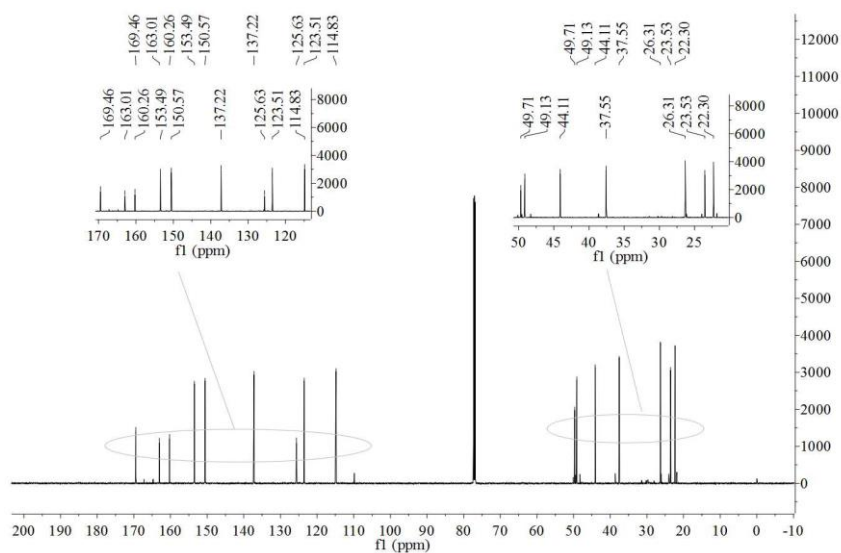

**Figure S146.**  $^{13}\text{C}$ -NMR spectrum of (*E*)-verbenone *O*- $\beta$ -pyridylcarbonyl oxime **4n** in  $\text{CDCl}_3$ .

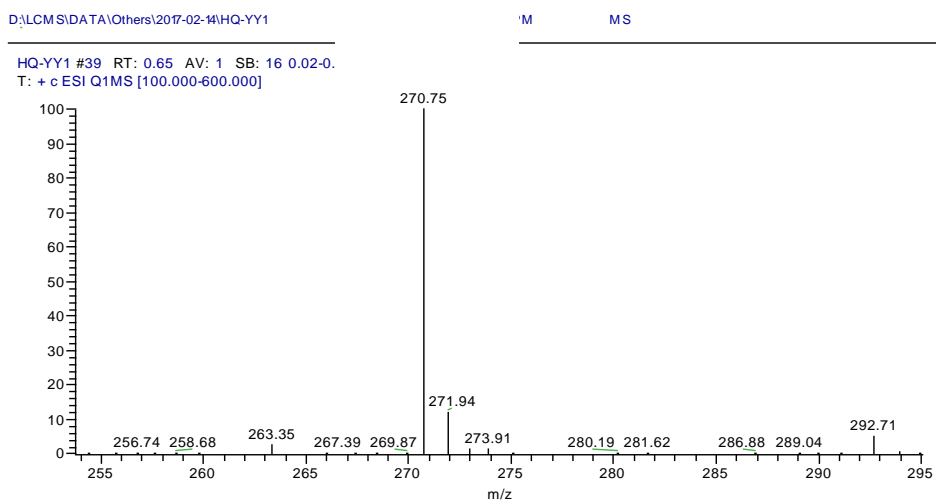

**Figure S147.** ESI-MS spectrum of (*E*)-verbenone *O*- $\beta$ -pyridylcarbonyl oxime **4n**.
